# Supplementary material
Source: PubMed Central journal article supplement (PMC6868879)
Supplement: ao9b02035_si_001.pdf [file ao9b02035_si_001.pdf]

# Diversity Oriented Metal Decoration on UiO-Type Metal-Organic Frameworks: an Efficient Approach to Increase CO<sub>2</sub> Uptake and Catalytic Conversion to Cyclic Carbonates

*Fataneh Norouzi and Hamid Reza Khavasi,\**

Department of Inorganic Chemistry and Catalysis, Shahid Beheshti University, General Campus, Evin, Tehran 1983963113, Iran

E-mail: [h-khavasi@sbu.ac.ir](mailto:h-khavasi@sbu.ac.ir), [khavasihr@gmail.com](mailto:khavasihr@gmail.com)

**RECEIVED DATE (to be automatically inserted after your manuscript is accepted if required according to the journal that you are submitting your paper to)**

CORRESPONDING AUTHOR FOOTNOTE: Hamid Reza Khavasi, Tel No: +98 21 29903105, Fax No: +98 21 22431661.

| <b>Contents</b>                                                    | <b>Page</b> |
|--------------------------------------------------------------------|-------------|
| <b>Experimental Details</b>                                        | S1          |
| <b>Figure S1.</b> PXRD patterns of metal-grafted Bipy-UiO-67 MOFs. | S6          |
| <b>Figure S2-S23-</b> NMR spectrum for data reported in Table 1.   | S7-S28      |
| <b>Figure S24-S32-</b> NMR spectrum for data reported in Table 2.  | S29-S37     |
| <b>Figure S33-S42-</b> NMR spectrum for data reported in Table 4.  | S38-S47     |
| <b>Figure S43-S47-</b> NMR spectra of recyclability tests.         | S78-S52     |

## Experimental Details, Representative Procedure for the Cyclic Carbonate Formation:

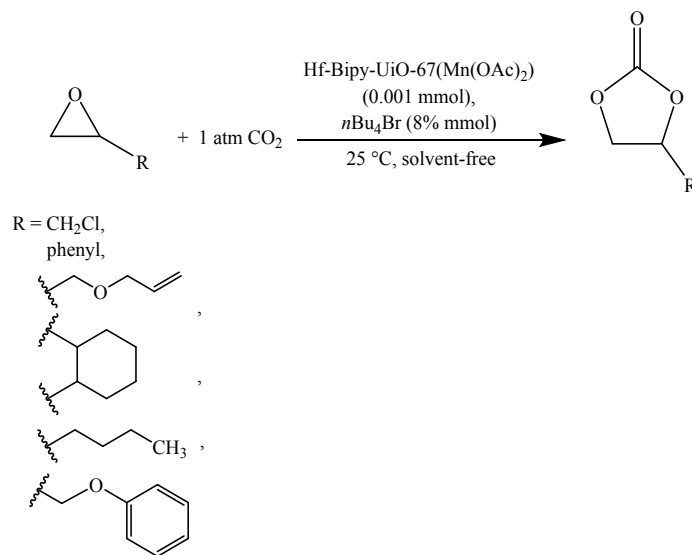

### 4-(chloromethyl)-1,3-dioxolan-2-one

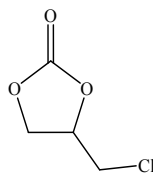

In a 20 mL glass reactor, epichlorohydrin (4.3 mmol, 0.397 mL), Hf-Bipy-UiO-67(Mn(OAc)<sub>2</sub>) (0.001 mmol, 0.012 g), *n*Bu<sub>4</sub>Br (8% mmol, 0.11 g) were added with a magnetic stirring bar. Then, the reactor was flushed under 1 bar pressure of CO<sub>2</sub> at room temperature for 12h. After completion, the reaction mixture was analyzed by <sup>1</sup>H NMR (yield: 99%).

<sup>1</sup>H NMR (300 MHz, CDCl<sub>3</sub>): 3.73-3.85 (2H, m, CH<sub>2</sub>—Cl), 4.43 (1H, dd, <sup>2</sup>*J*<sub>HH</sub> = 15 Hz, <sup>3</sup>*J*<sub>HH</sub> = 6 Hz, O—CH<sub>2</sub>), 4.65 (1H, dd, <sup>2</sup>*J*<sub>HH</sub> = 15 Hz, <sup>3</sup>*J*<sub>HH</sub> = 9 Hz, O—CH<sub>2</sub>) and 5.04 (1H, m, O—CH). <sup>13</sup>C NMR (75 MHz, CDCl<sub>3</sub>): 44.1 (CH<sub>2</sub>—Cl), 67.2 (O—CH<sub>2</sub>), 74.0 (O—CH) and 153.8 (C=O).

### 4-phenyl-1,3-dioxolan-2-one

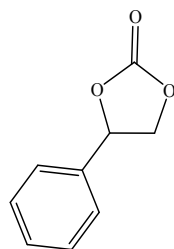

In a 20 mL glass reactor, styrene oxide (4.3 mmol, 0.516 mL), Hf-Bipy-UiO-67(Mn(OAc)<sub>2</sub>) (0.001 mmol, 0.012 g), *n*Bu<sub>4</sub>Br (8% mmol, 0.11 g) were added with a magnetic stirring bar. Then, the reactor was flushed under 1 bar pressure of CO<sub>2</sub> at 50 °C for 4h. After completion, the reaction mixture was analyzed by <sup>1</sup>H NMR (yield: >99%).

<sup>1</sup>H NMR (300 MHz, CDCl<sub>3</sub>): 4.34 (1H, dd, <sup>2</sup>*J*<sub>HH</sub> = 9 Hz, <sup>3</sup>*J*<sub>HH</sub> = 6 Hz, O—CH<sub>2</sub>), 4.83 (1H, dd, <sup>2</sup>*J*<sub>HH</sub> = 6 Hz, <sup>3</sup>*J*<sub>HH</sub> = 3 Hz, O—CH<sub>2</sub>), 5.68-5.64 (1H, m, O—CH) and 7.35-7.43 (5H, m, Ph). <sup>13</sup>C NMR (75 MHz, CDCl<sub>3</sub>): 71.1 (O—CH<sub>2</sub>), 74.2 (O—CH), 122.6, 128.6, 129.9 (CH of Ph), 135.6 (C<sub>ipso</sub>) and 158.6 (C=O).

#### 4-((allyloxy)methyl)-1,3-dioxolan-2-one

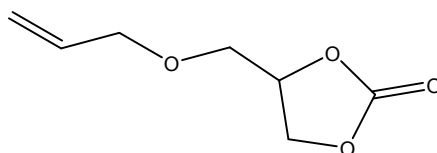

In a 20 mL glass reactor, allyl glycidyl ether (4.3 mmol, 0.490 mL), Hf-Bipy-UiO-67(Mn(OAc)<sub>2</sub>) (0.001 mmol, 0.012 g), *n*Bu<sub>4</sub>Br (8% mmol, 0.11 g) were added with a magnetic stirring bar. Then, the reactor was flushed under 1 bar pressure of CO<sub>2</sub> at 50 °C for 4h. After completion, the reaction mixture was analyzed by <sup>1</sup>H NMR (yield: >99%).

<sup>1</sup>H NMR (300 MHz, CDCl<sub>3</sub>): 3.71-3.72 (2H, m, O—CH<sub>2</sub>), 3.99-4.40 (2H, m, O—CH<sub>2</sub>), 4.37-4.65 (2H, m, O—CH<sub>2</sub>), 4.82-4.88 (1H, m, CH of allyl), 5.19-5.30 (2H, m, CH of allyl) and 5.79-5.92 (1H, m, O—CH). <sup>13</sup>C NMR (75 MHz, CDCl<sub>3</sub>): 155.2, 133.9, 117.3, 75.4, 72.3, 68.9, 66.2.

#### hexahydrobenzo[d][1,3]dioxol-2-one

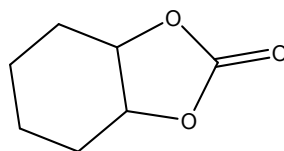

In a 20 mL glass reactor, 7-oxabicyclo[4.1.0]heptane (4.3 mmol, 0.422 mL), Hf-Bipy-UiO-67(Mn(OAc)<sub>2</sub>) (0.012 mmol, 0.006 g), *n*Bu<sub>4</sub>Br (8% mmol, 0.11 g) were added with a magnetic stirring bar. Then, the reactor was flushed under 1 bar pressure of CO<sub>2</sub> at 50 °C for 4h. After completion, the reaction mixture was analyzed by <sup>1</sup>H NMR (yield: >99%).

$^1\text{H}$  NMR (300 MHz,  $\text{CDCl}_3$ ): 1.61-1.72 (4H, m,  $2\text{CH}_2$ ), 1.82-1.96 (4H, m,  $2\text{CH}_2$ ) and 4.67-4.69 (2H, m,  $2\text{CH}$ ).  $^{13}\text{C}$  NMR (75 MHz,  $\text{CDCl}_3$ ): 19.2 ( $2\text{CH}_2$ ), 26.3 ( $2\text{CH}_2$ ), 75.4 ( $2\text{CH}$ ) and 158.6 ( $\text{C}=\text{O}$ ).

#### 4-butyl-1,3-dioxolan-2-one

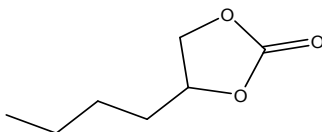

In a 20 mL glass reactor, (S)-2-butyloxirane (4.3 mmol, 0.430 mL), Hf-Bipy-UiO-67( $\text{Mn}(\text{OAc})_2$ ) (0.001 mmol, 0.012 g),  $n\text{Bu}_4\text{Br}$  (8% mmol, 0.11 g) were added with a magnetic stirring bar. Then, the reactor was flushed under 1 bar pressure of  $\text{CO}_2$  at  $50^\circ\text{C}$  for 4h. After completion, the reaction mixture was analyzed by  $^1\text{H}$  NMR (yield: 95%).

$^1\text{H}$  NMR (300 MHz,  $\text{CDCl}_3$ ): 0.89-0.99 (3H, m,  $\text{CH}_3$ ), 1.32-1.45 (4H, m,  $2\text{CH}_2$ ), 1.61-1.64 (2H, m,  $\text{CH}_2$ ), 4.05 (1H, t,  $^3J_{\text{HH}} = 9$  Hz,  $\text{O}-\text{CH}$ ), 4.53 (1H, dd,  $^2J_{\text{HH}} = 9$  Hz,  $^3J_{\text{HH}} = 6$  Hz,  $\text{O}-\text{CH}_2$ ) and 4.65-4.68 (1H, m,  $\text{O}-\text{CH}_2$ ).  $^{13}\text{C}$  NMR (75 MHz,  $\text{CDCl}_3$ ): 13.3 ( $\text{CH}_3$ ), 21.4, 27.9, 37.5 ( $3\text{CH}_2$ ), 66.1 ( $\text{O}-\text{CH}_2$ ), 75.3 ( $\text{O}-\text{CH}$ ) and 155.6 ( $\text{C}=\text{O}$ ).

#### 4-(phoxymethyl)-1,3-dioxolan-2-one

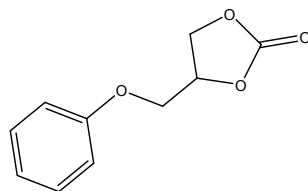

In a 20 mL glass reactor, 1,2-Epoxy-3-phenoxy propane (4.3 mmol, 0.645 mL), Hf-Bipy-UiO-67( $\text{Mn}(\text{OAc})_2$ ) (0.001 mmol, 0.012 g),  $n\text{Bu}_4\text{Br}$  (8% mmol, 0.11 g) were added with a magnetic stirring bar. Then, the reactor was flushed under 1 bar pressure of  $\text{CO}_2$  at  $50^\circ\text{C}$  for 4h. After completion, the reaction mixture was analyzed by  $^1\text{H}$  NMR (yield: 95%).

$^1\text{H}$  NMR (300 MHz,  $\text{CDCl}_3$ ): 4.08-4.29 (2H, m,  $\text{O}-\text{CH}_2$ ), 4.54-4.68 (2H, m,  $\text{O}-\text{CH}_2$ ), 5.07 (2H, m,  $\text{O}-\text{CH}$ ), 6.93 (2H, d,  $^3J_{\text{HH}} = 6$  Hz,  $2\text{CH}_{\text{ortho}}$  of Ph), 7.04 (1H, t,  $^3J_{\text{HH}} = 9$  Hz,  $\text{CH}_{\text{para}}$  of Ph) and 7.33 (2H, t,  $^3J_{\text{HH}} = 9$  Hz,  $2\text{CH}_{\text{meta}}$  of Ph).  $^{13}\text{C}$  NMR (75 MHz,  $\text{CDCl}_3$ ): 66.3 ( $\text{O}-\text{CH}_2$ ), 67.4 ( $\text{O}-\text{CH}$ ), 74.5 ( $\text{O}-\text{CH}_2$ ), 114.5, 121.7, 129.3 ( $3\text{CH}$  of Ph), 154.4 ( $\text{C}_{\text{ipso}}$ ) and 157.8 ( $\text{C}=\text{O}$ ).

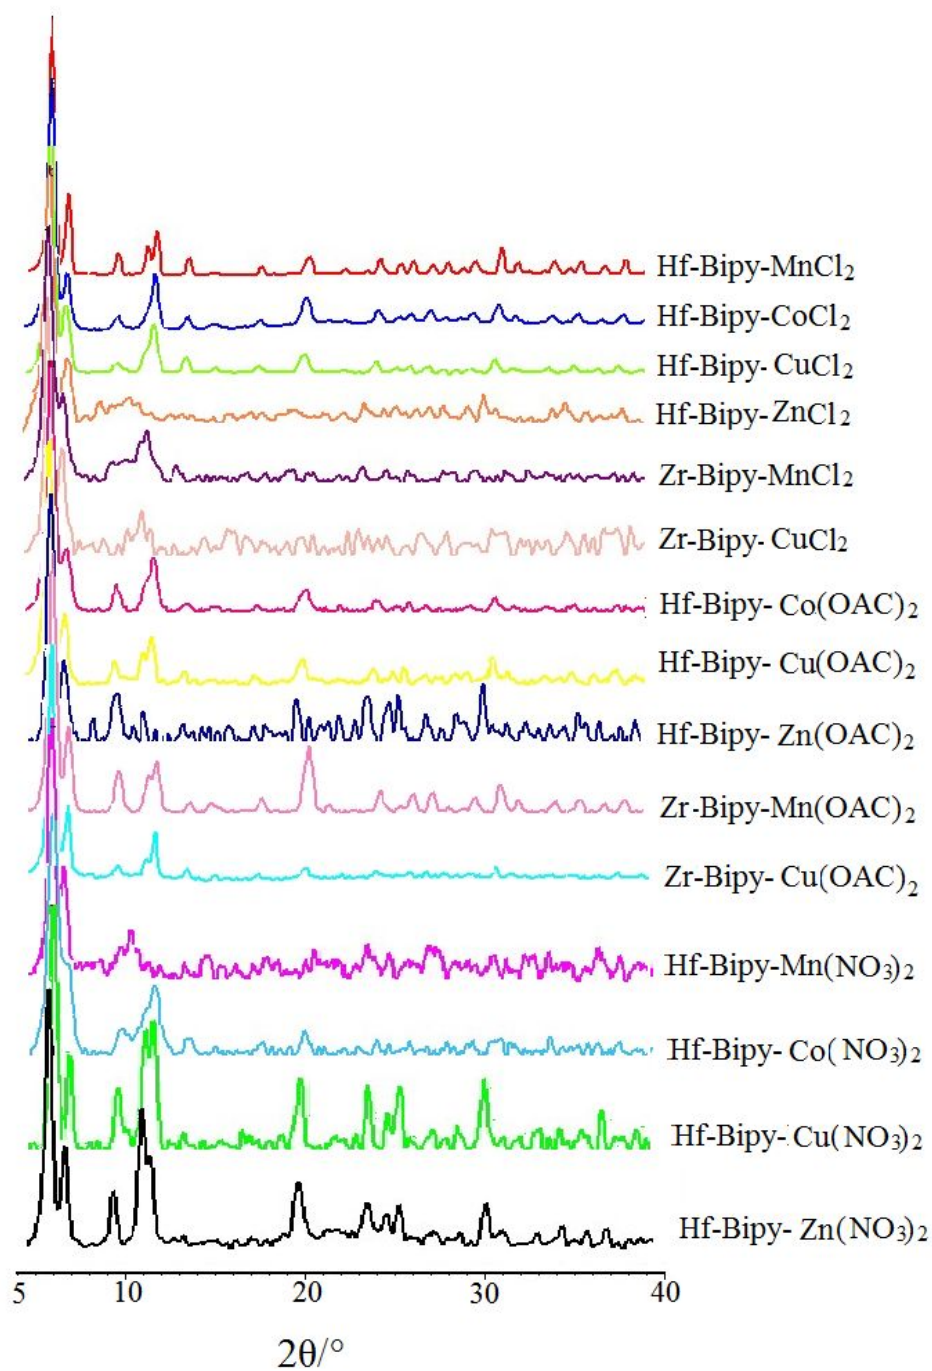

**Figure S1.** PXRD patterns of metal-grafted Bipy-UiO-67 MOFs.

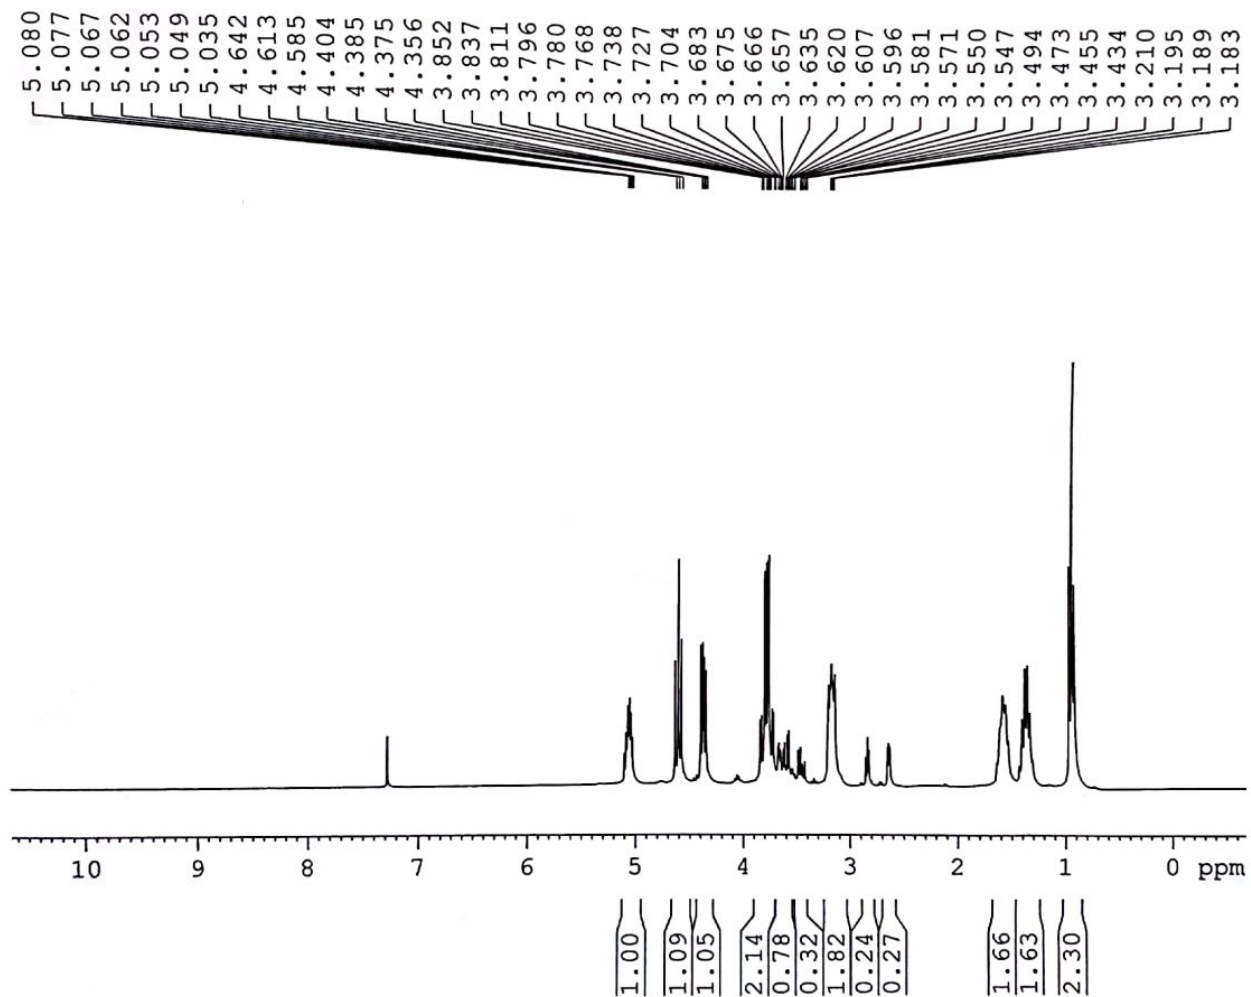

**Figure S2.** <sup>1</sup>H-NMR spectrum for data reported in Table 1, Entry 1.

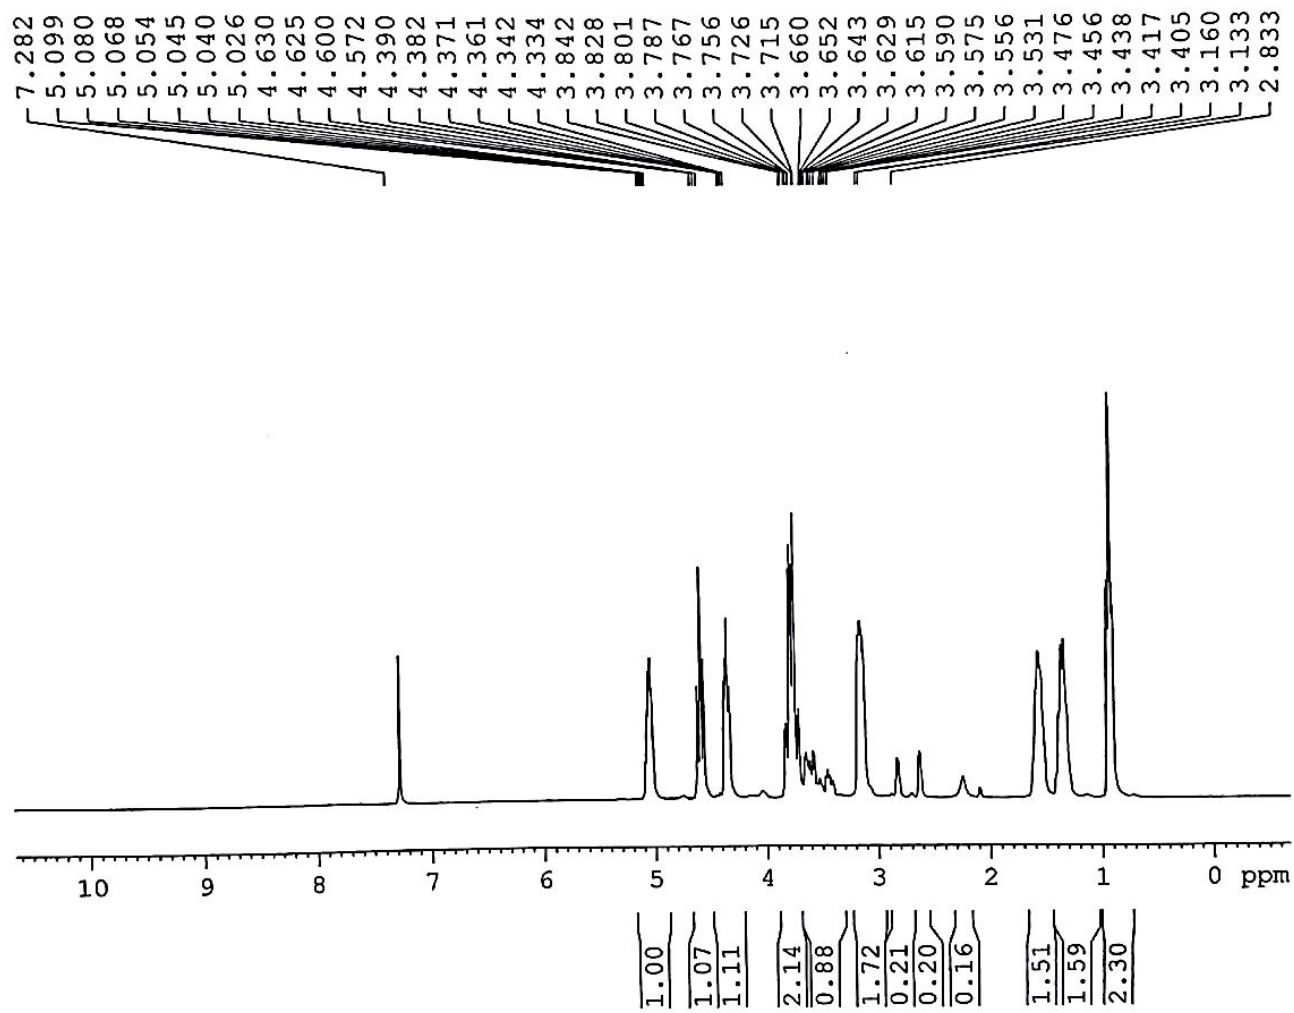

**Figure S3.**  $^1\text{H}$ -NMR spectrum for data reported in Table 1, Entry 2.



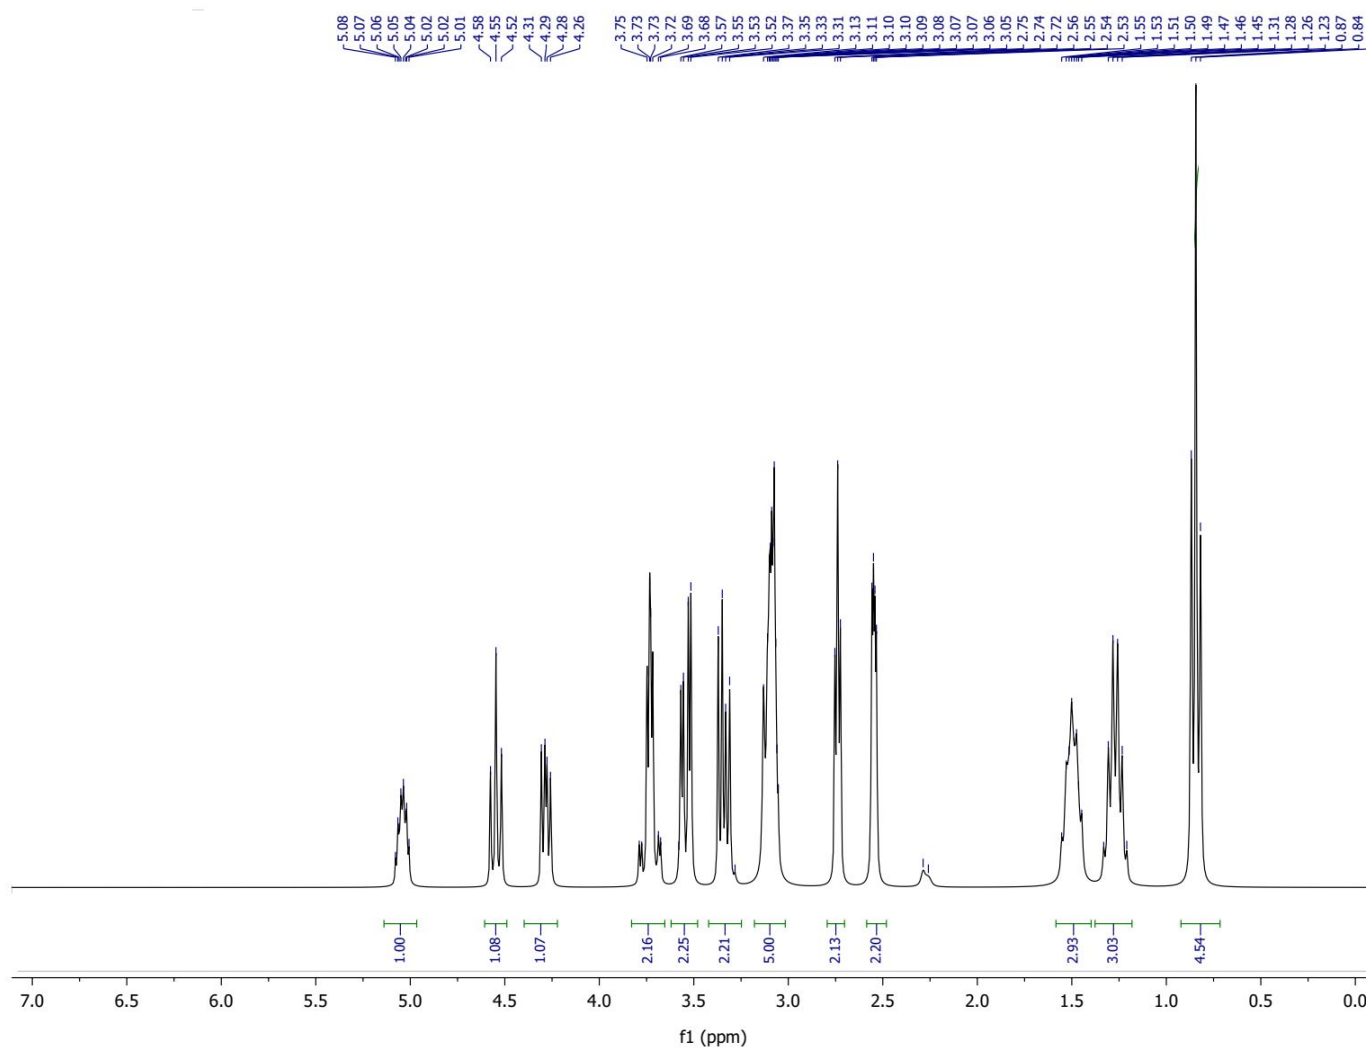

**Figure S4.**  $^1\text{H-NMR}$  spectrum for data reported in Table 1, Entry 3.

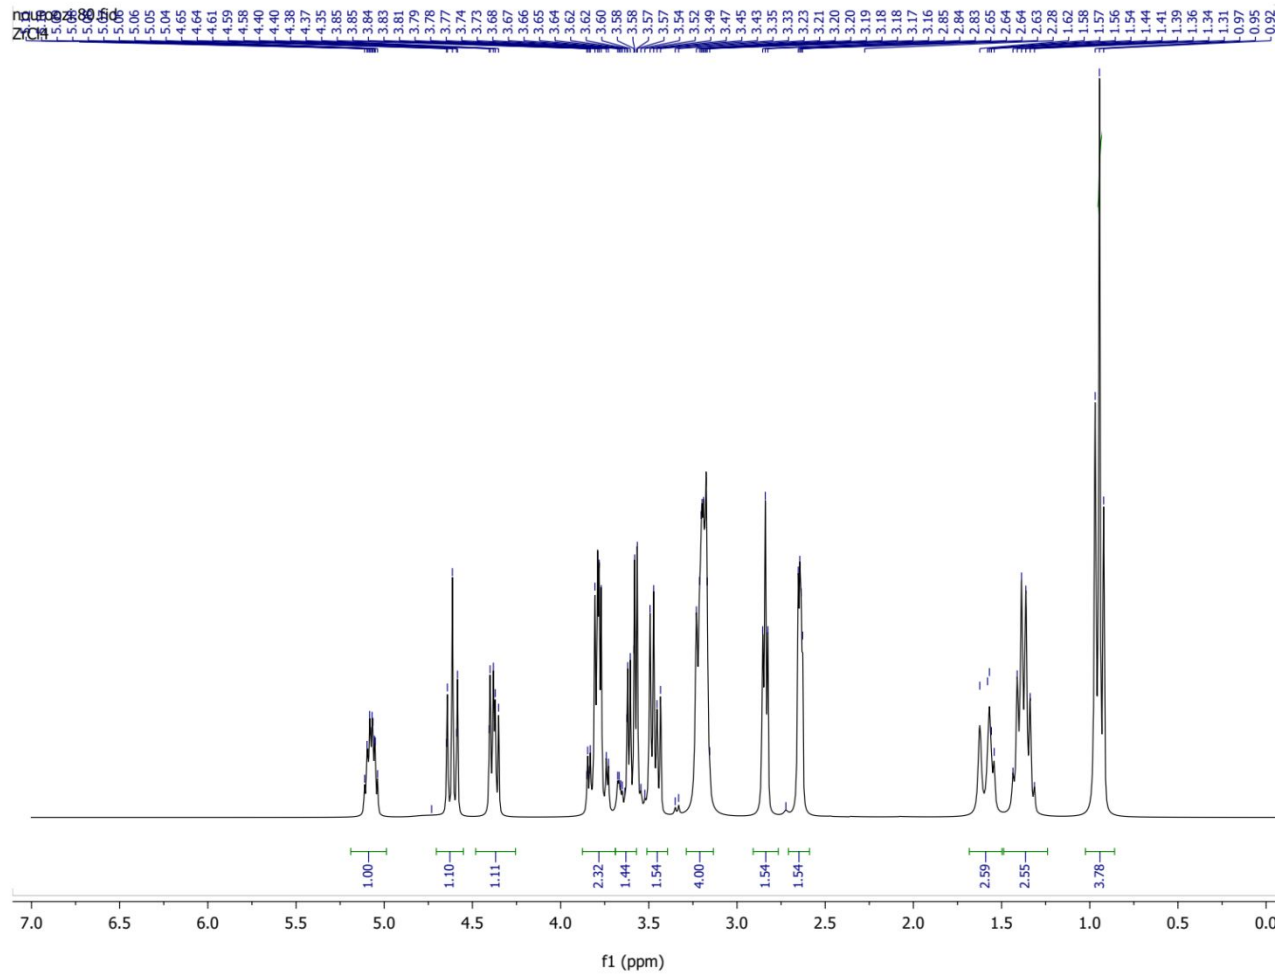

**Figure S5.**  $^1\text{H}$ -NMR spectrum for data reported in Table 1, Entry 4.

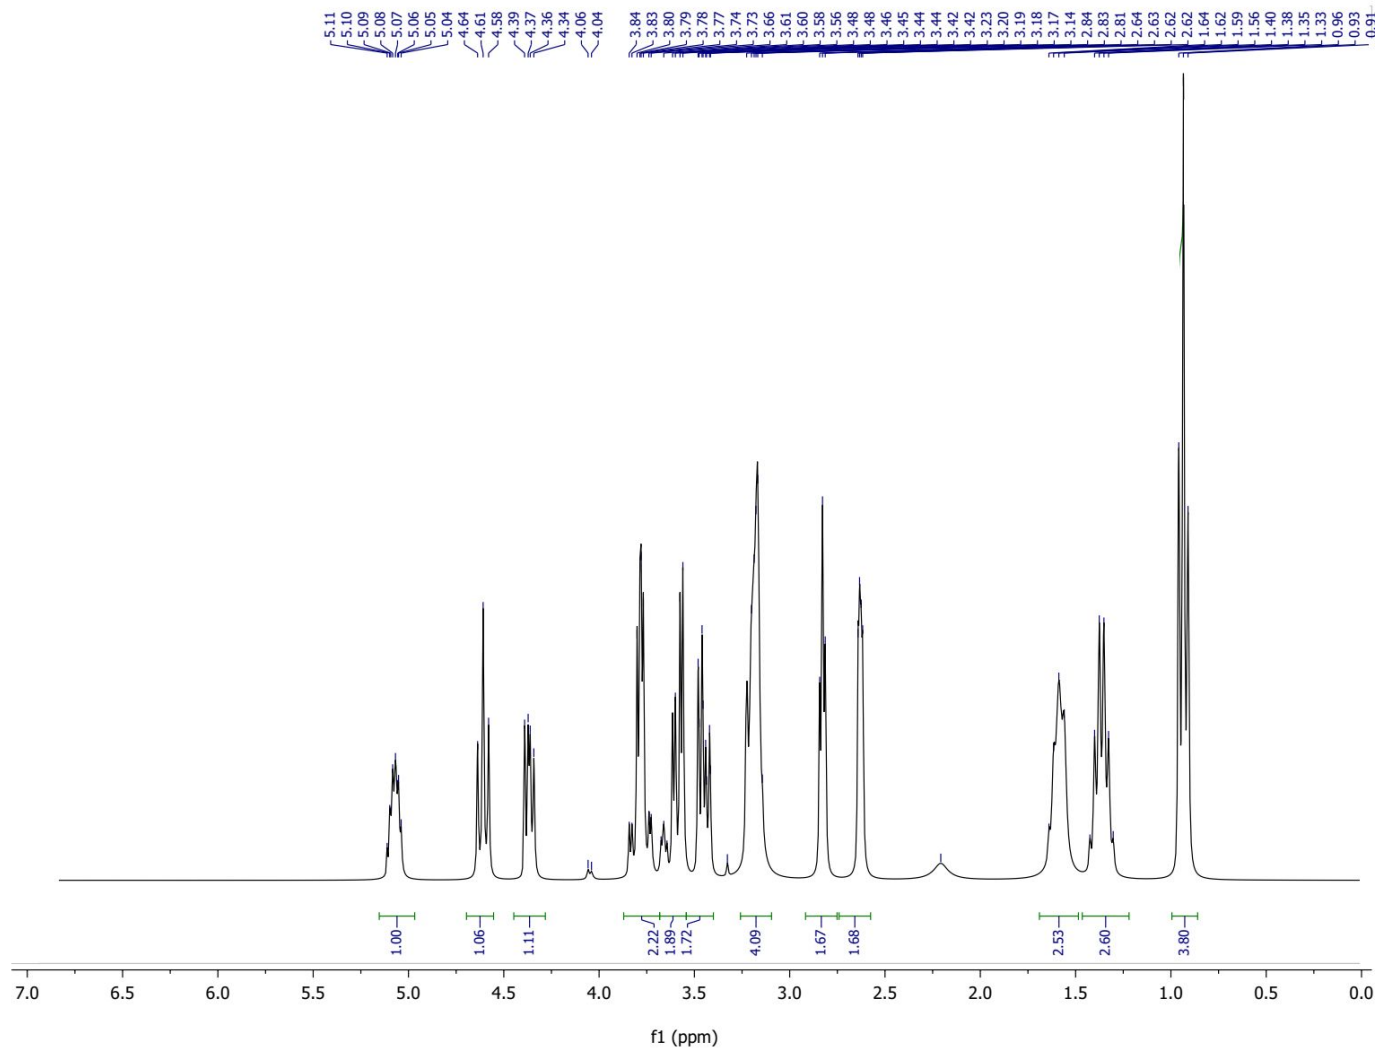

**Figure S6.**  $^1\text{H}$ -NMR spectrum for data reported in Table 1, Entry 5.

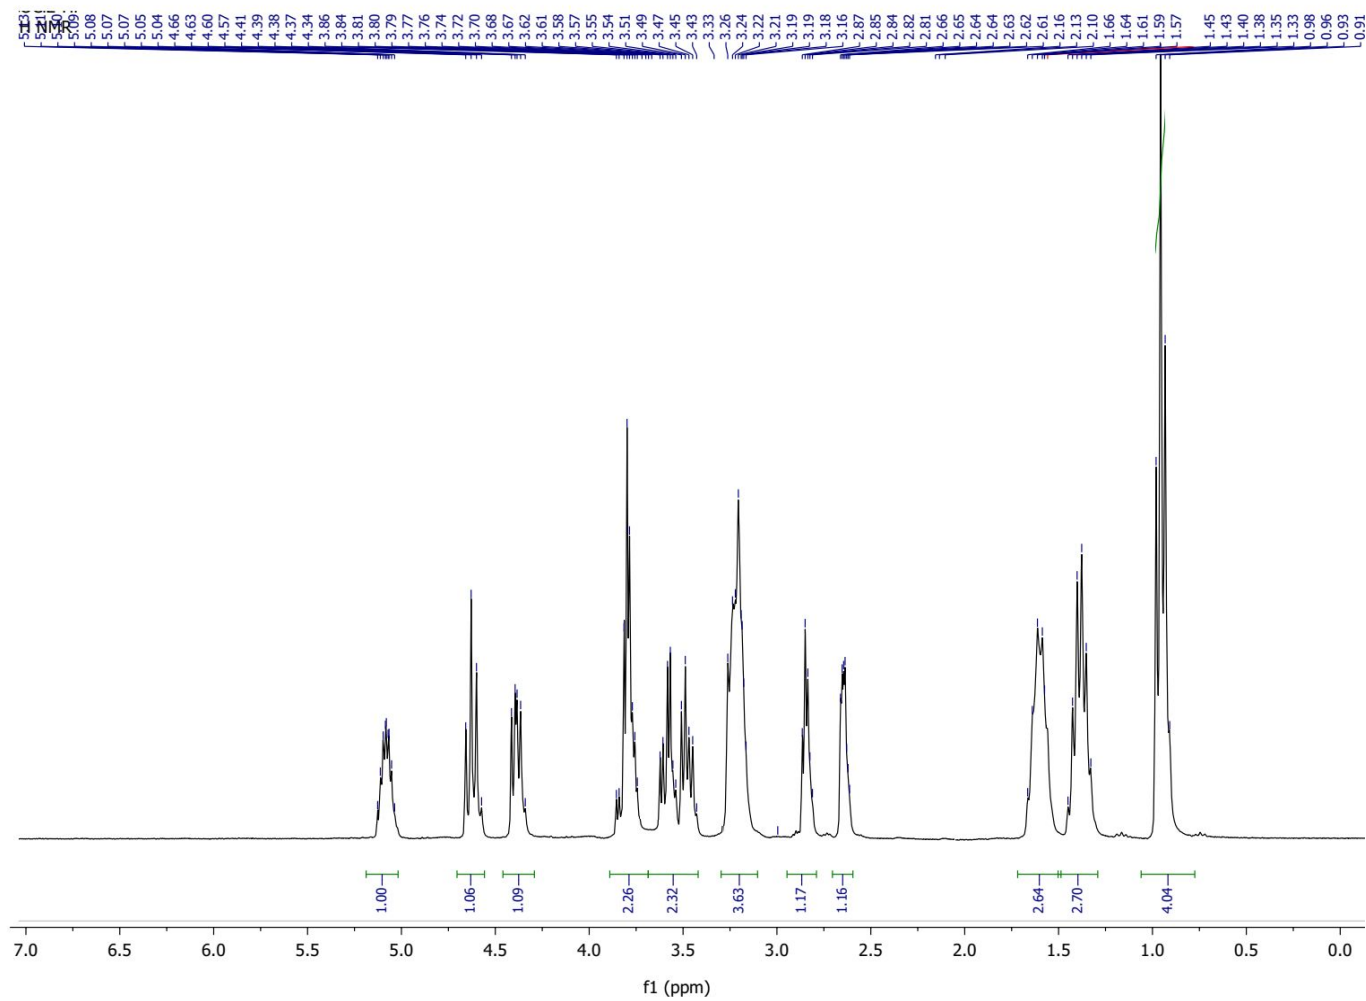

**Figure S7.**  $^1\text{H}$ -NMR spectrum for data reported in Table 1, Entry 6.

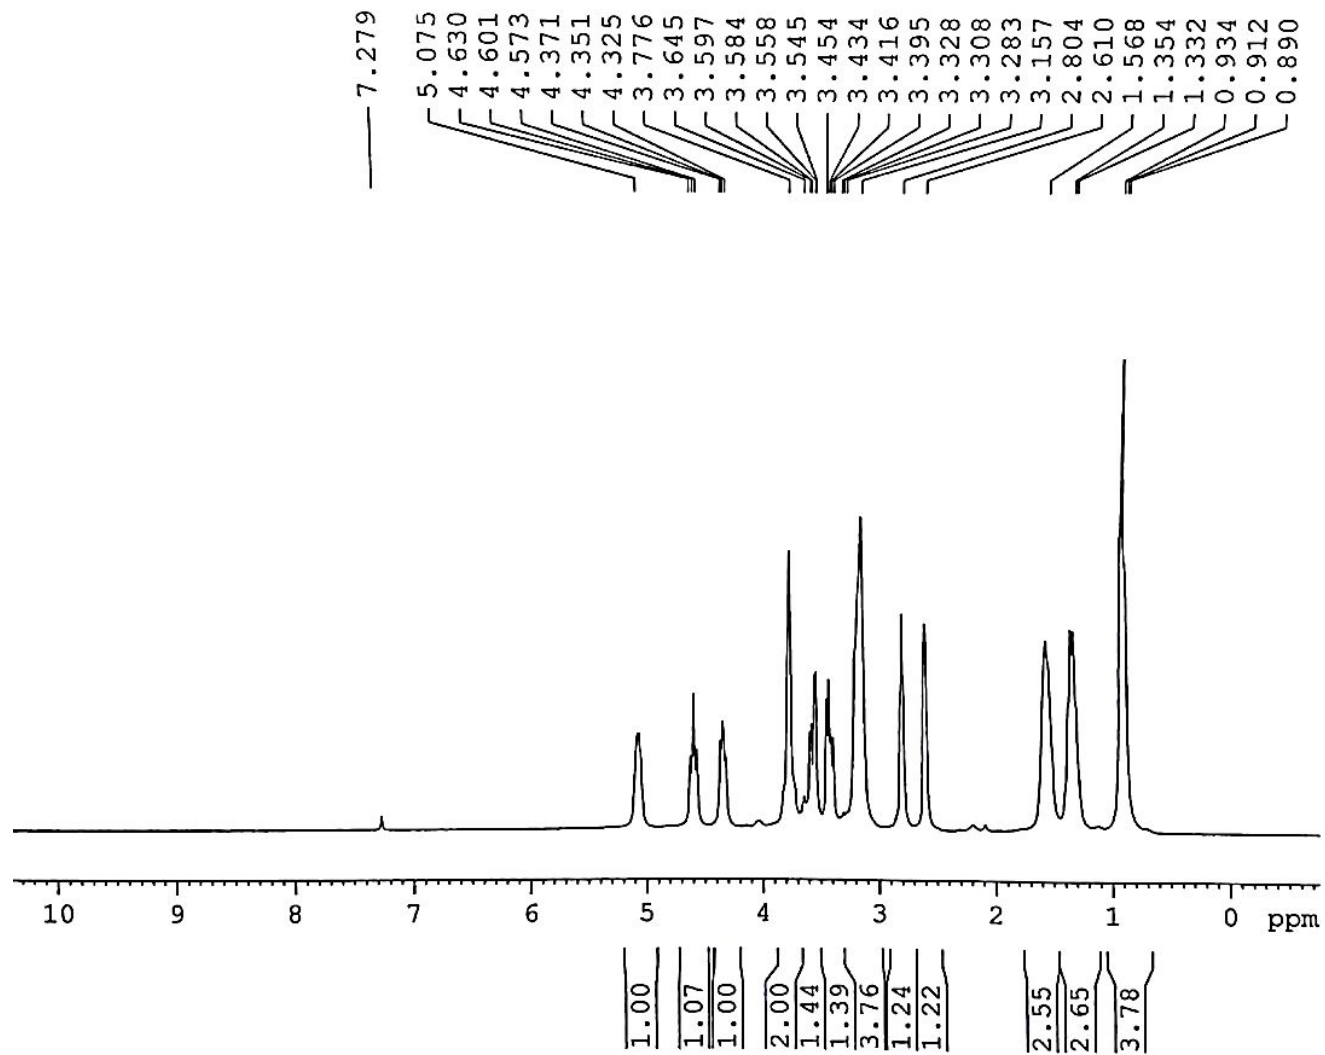

**Figure S8.**  $^1\text{H}$ -NMR spectrum for data reported in Table 1, Entry 7.

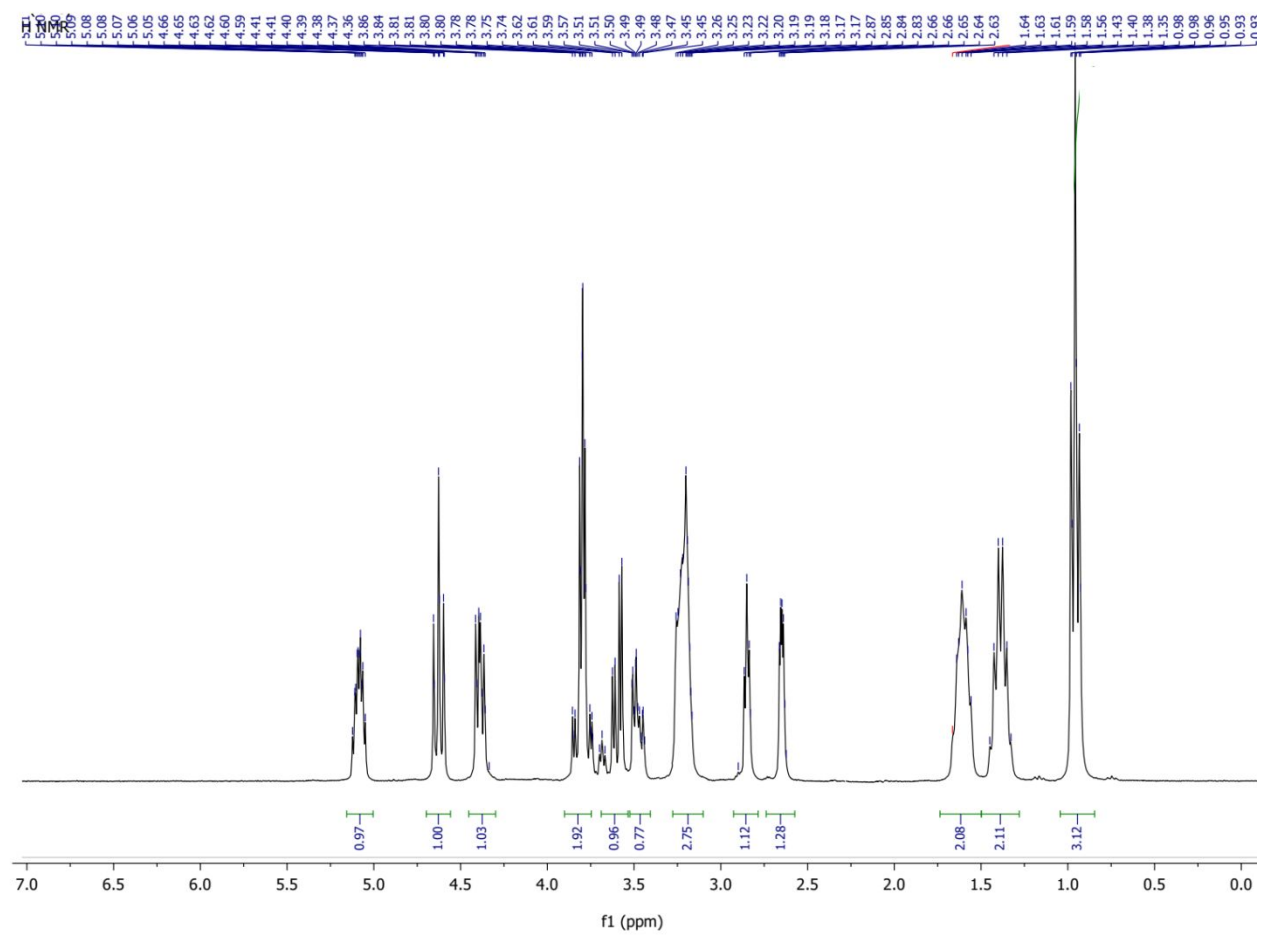

**Figure S9.**  $^1\text{H}$ -NMR spectrum for data reported in Table 1, Entry 8.

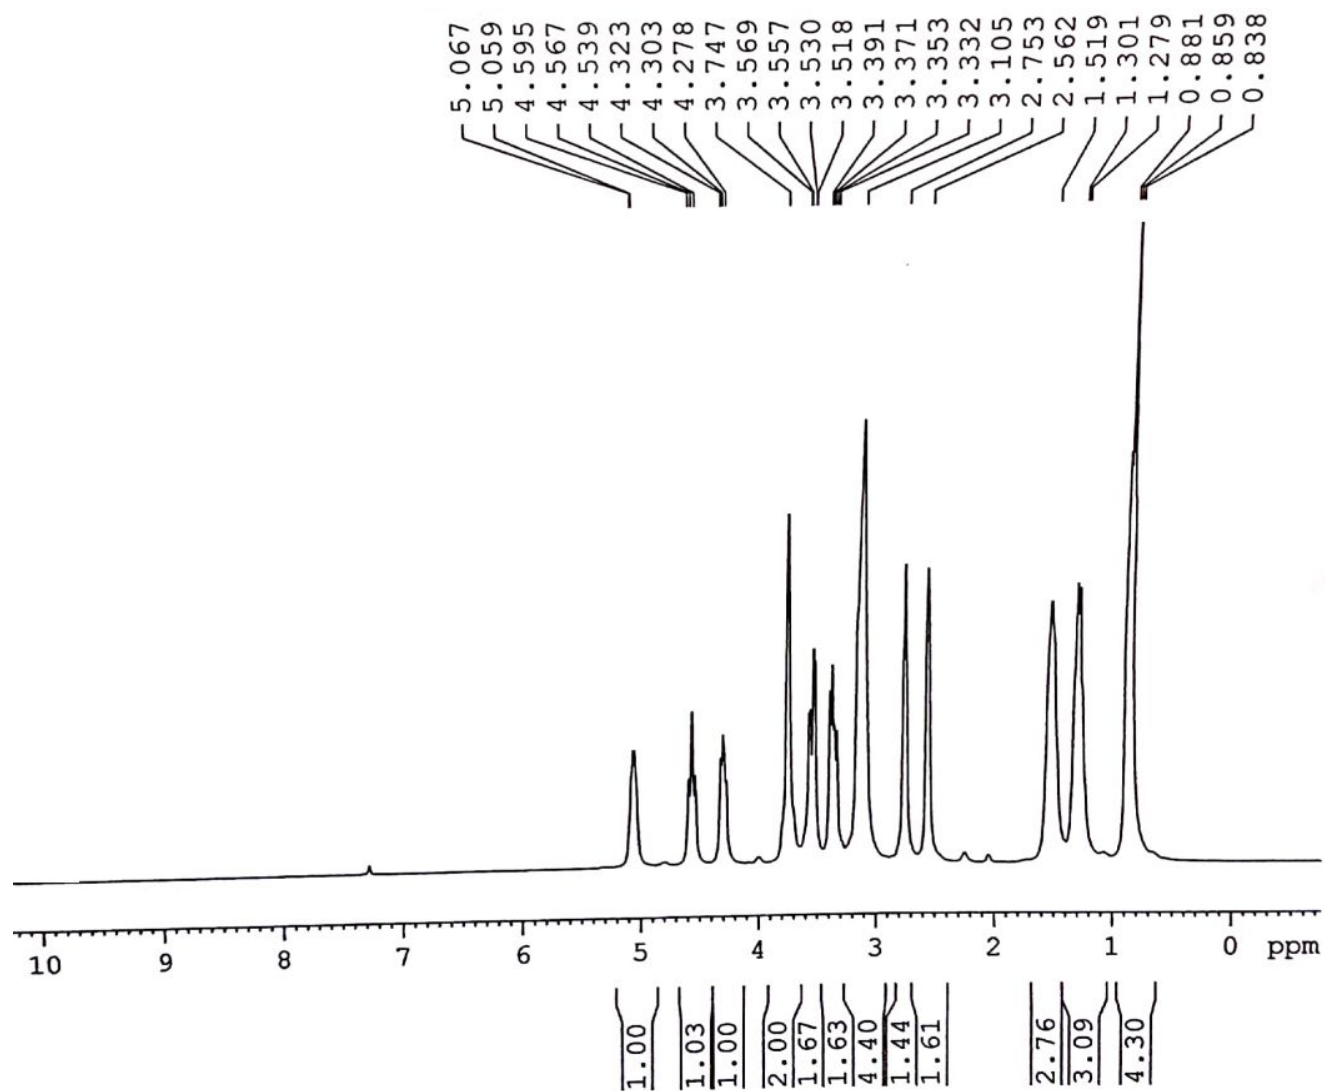

**Figure S10.**  $^1\text{H}$ -NMR spectrum for data reported in Table 1, Entry 9.

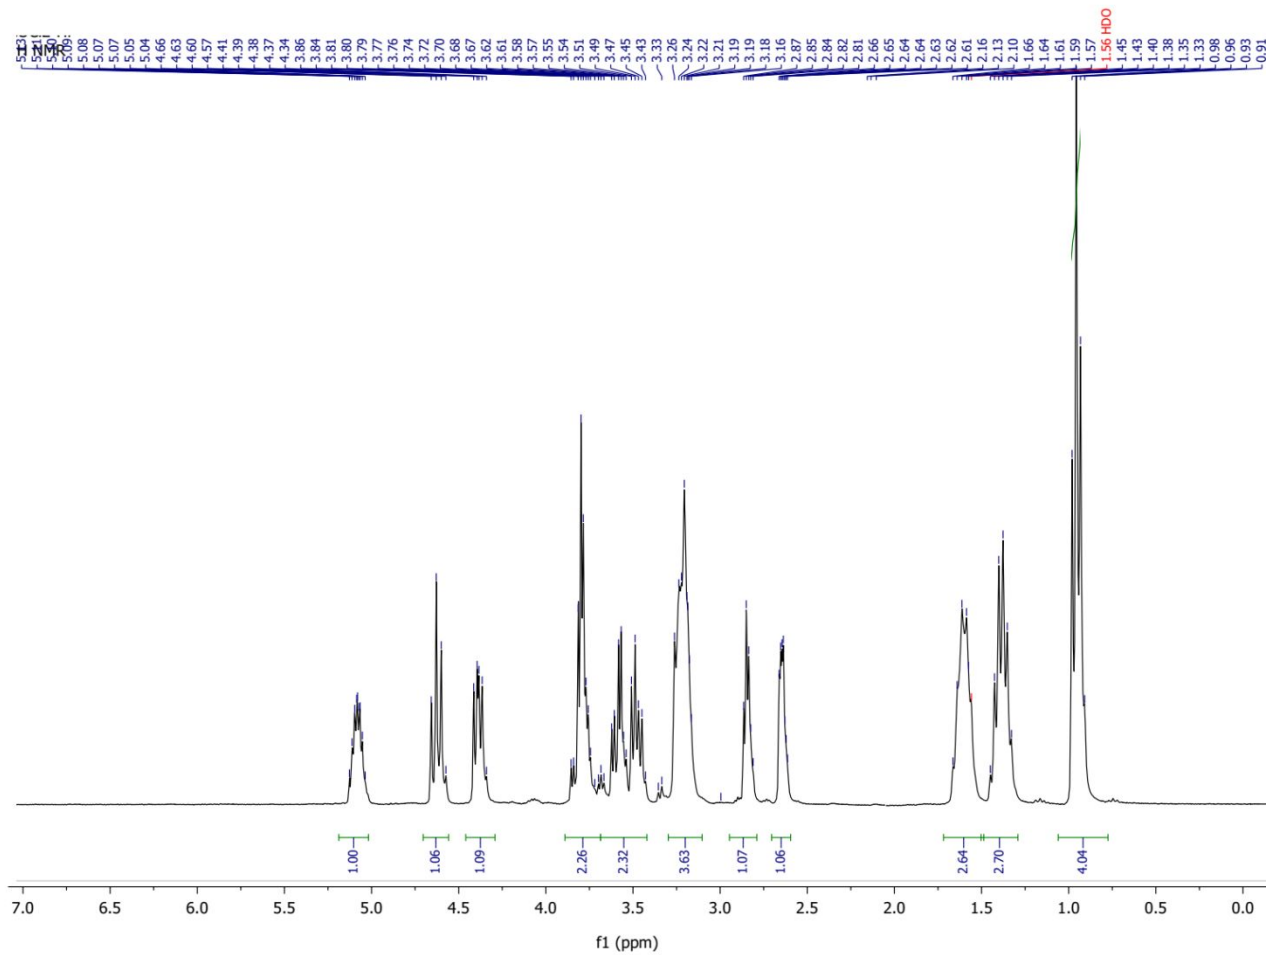

**Figure S11.** <sup>1</sup>H-NMR spectrum for data reported in Table 1, Entry 10.



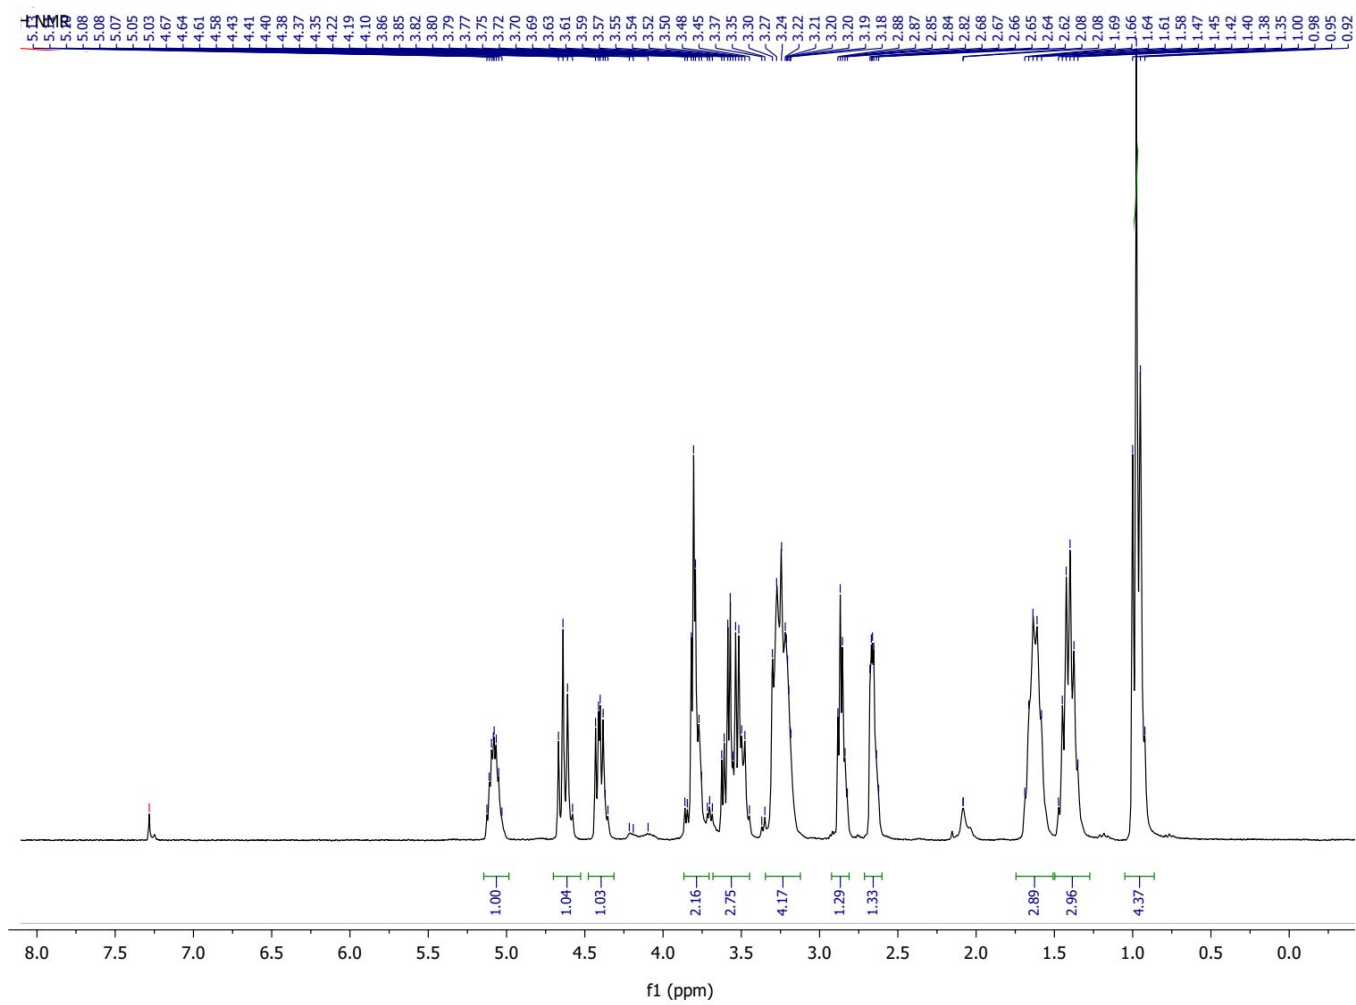

**Figure S12.**  $^1\text{H}$ -NMR spectrum for data reported in Table 1, Entry 11.

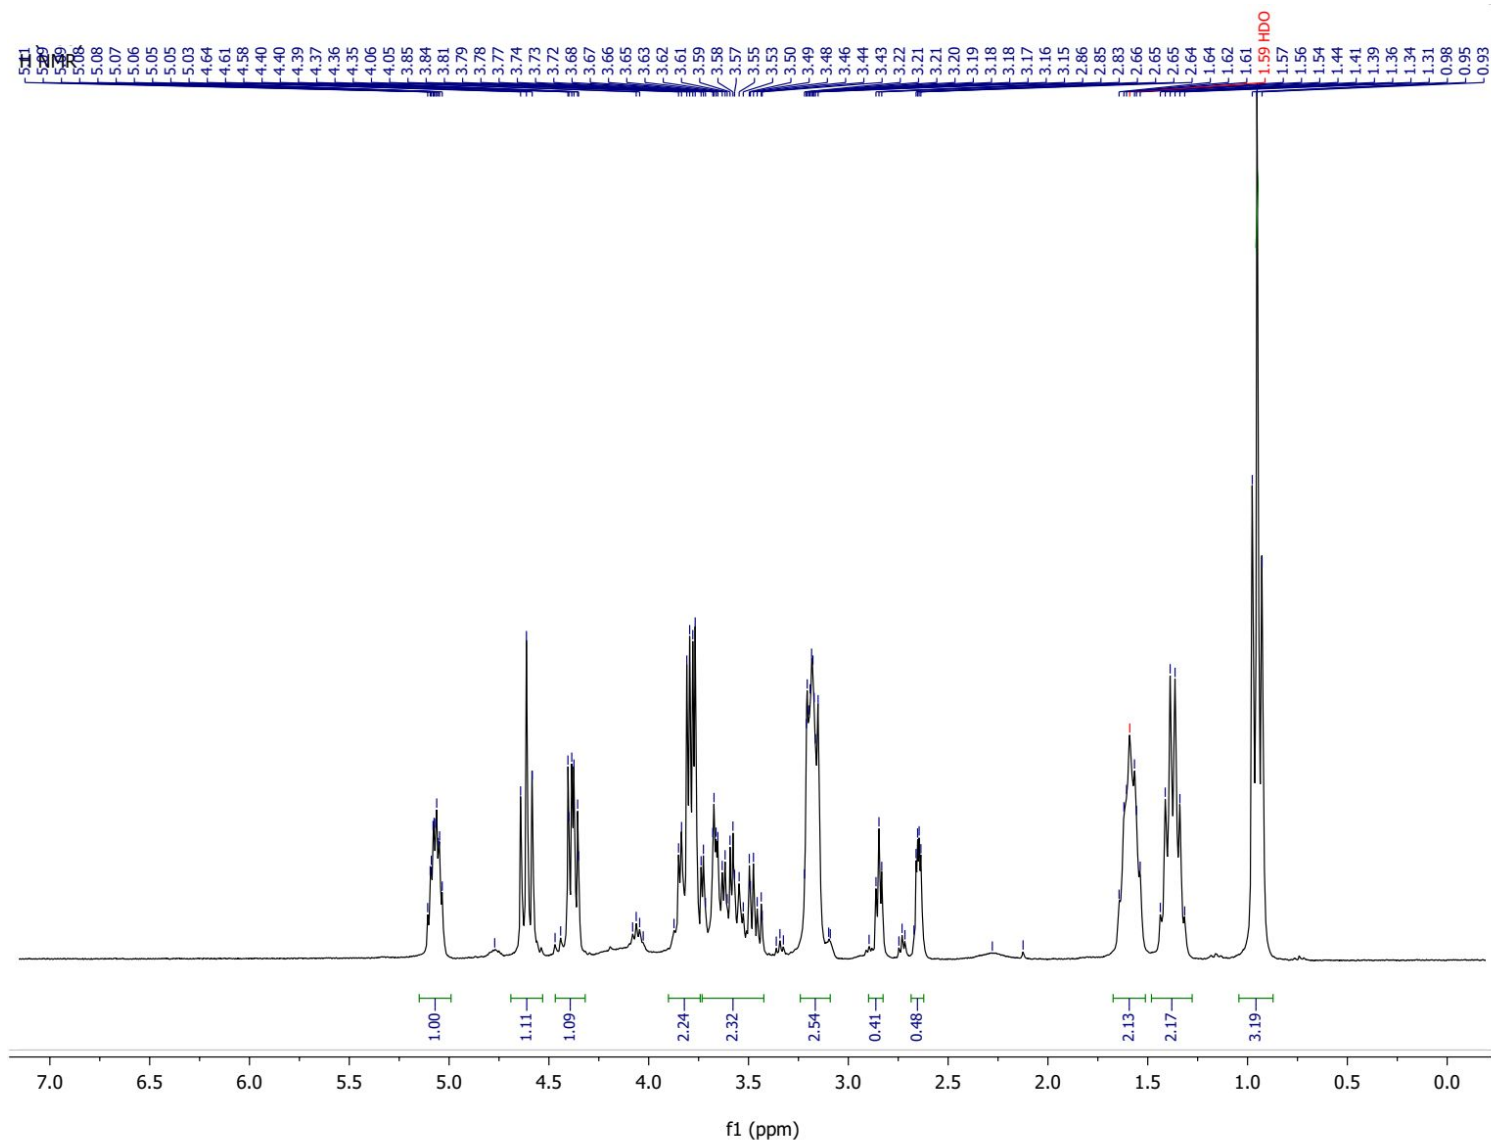

**Figure S13.** <sup>1</sup>H-NMR spectrum for data reported in Table 1, Entry 12.

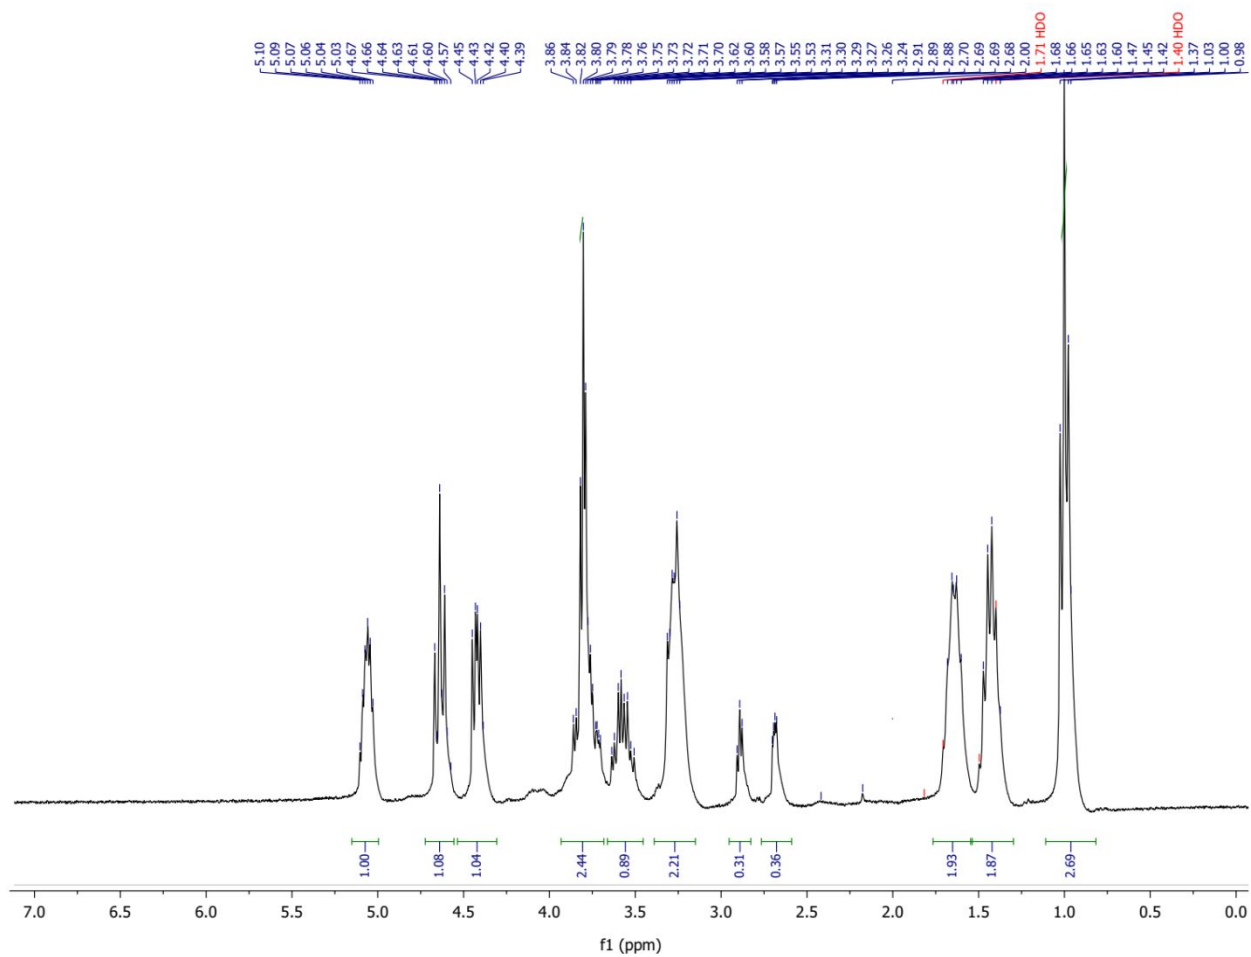

**Figure S14.** <sup>1</sup>H-NMR spectrum for data reported in Table 1, Entry 13.

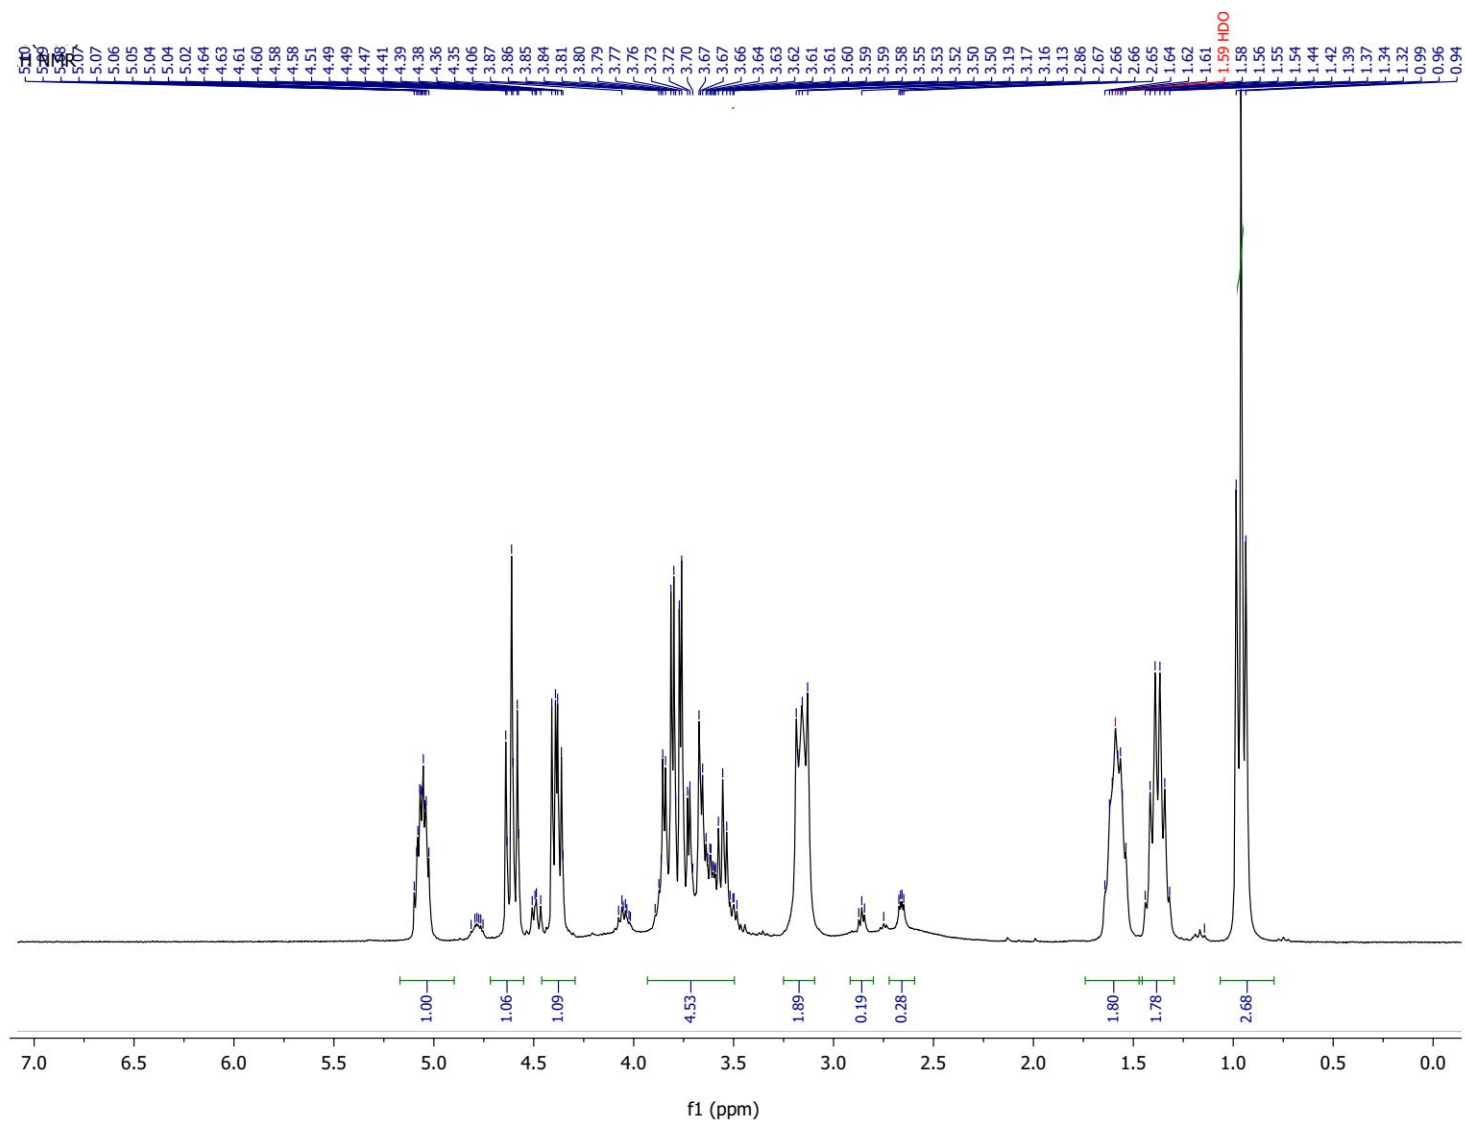

Figure S15. <sup>1</sup>H-NMR spectrum for data reported in Table 1, Entry 14.

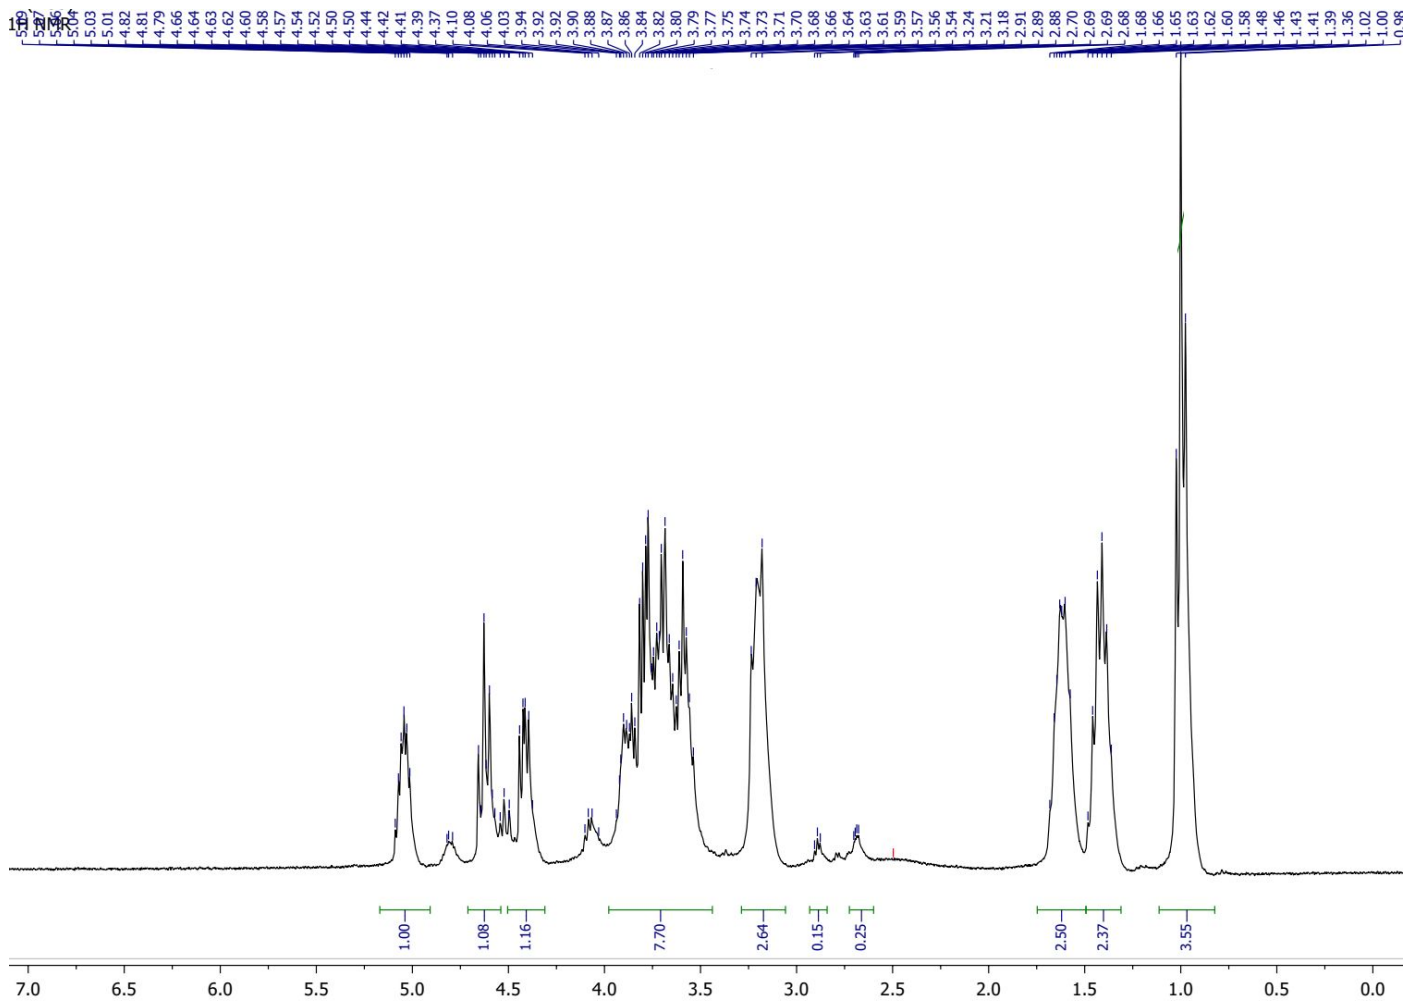

Figure S16. <sup>1</sup>H-NMR spectrum for data reported in Table 1, Entry 15.

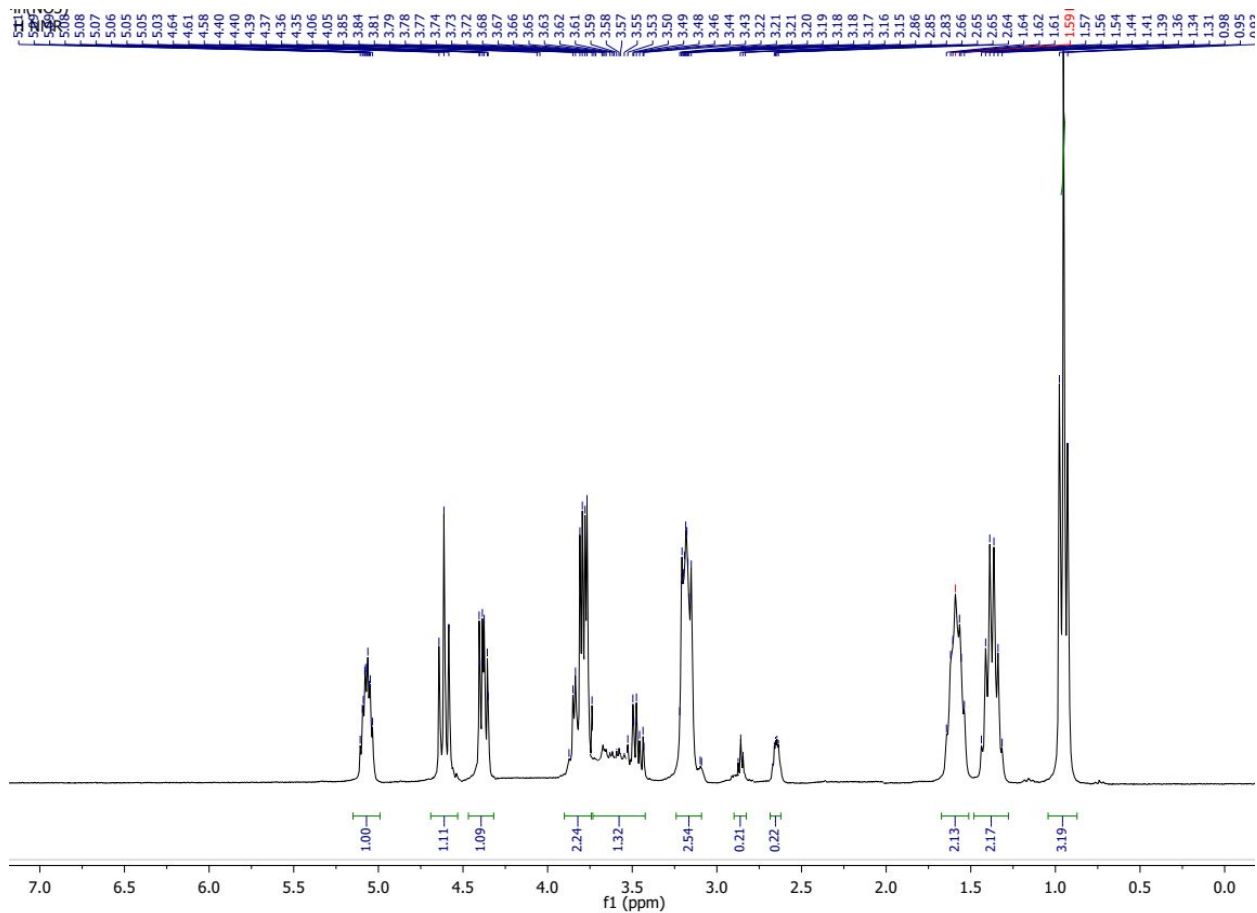

**Figure S17.**  $^1\text{H}$ -NMR spectrum for data reported in Table 1, Entry 16.

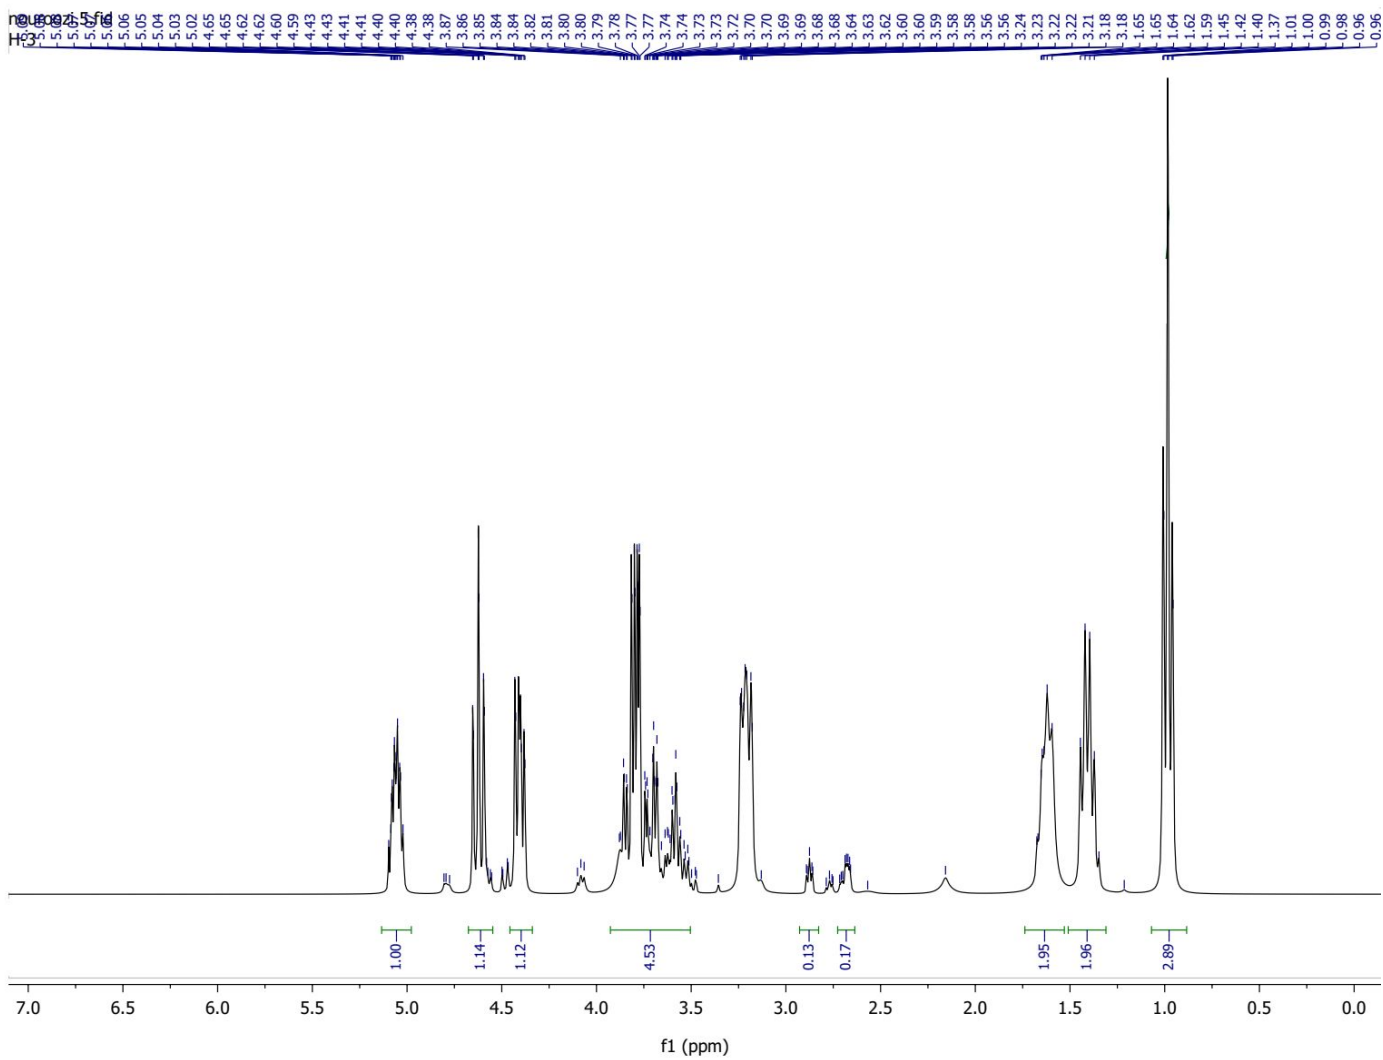

**Figure S18.**  $^1\text{H}$ -NMR spectrum for data reported in Table 1, Entry 17.

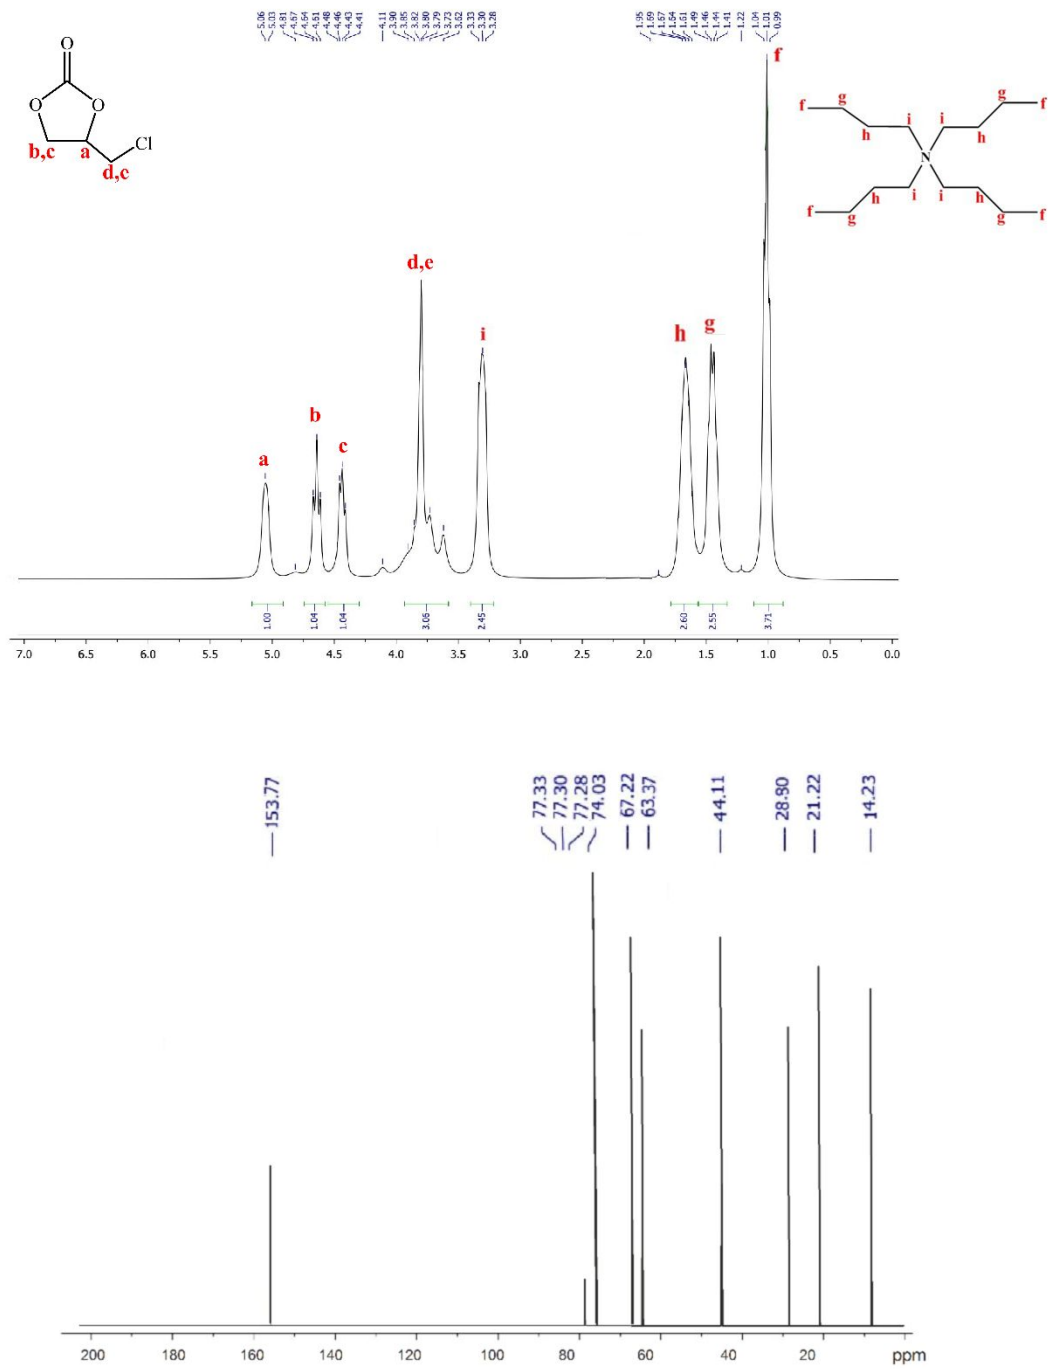

**Figure S19.** <sup>1</sup>H-NMR and <sup>13</sup>C-NMR spectrum for data reported in Table 1, Entry 18.



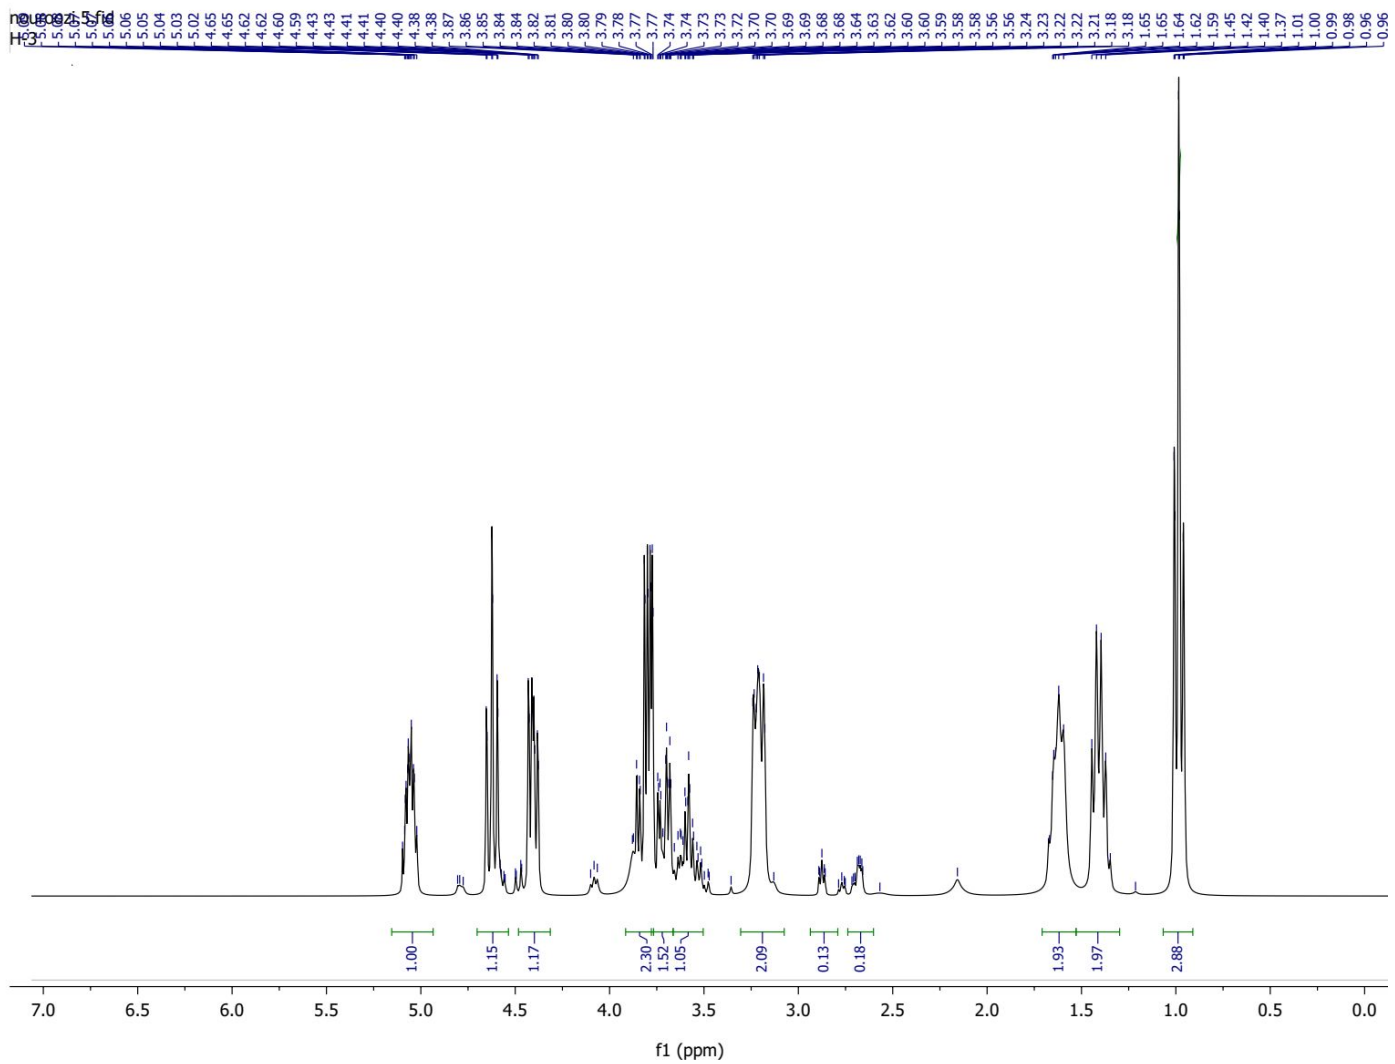

Figure S20. <sup>1</sup>H-NMR spectrum for data reported in Table 1, Entry 19.

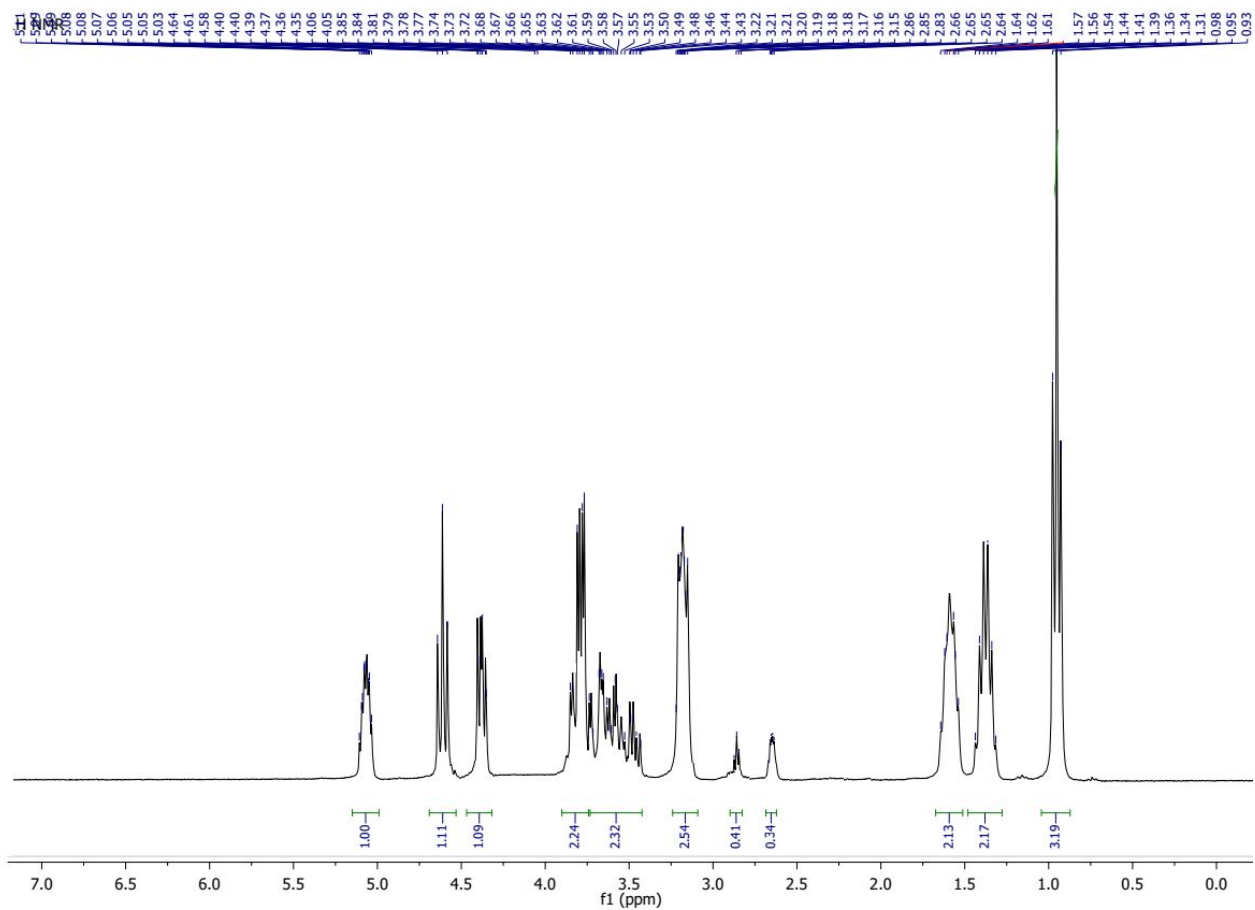

**Figure S21.**  $^1\text{H}$ -NMR spectrum for data reported in Table 1, Entry 20.

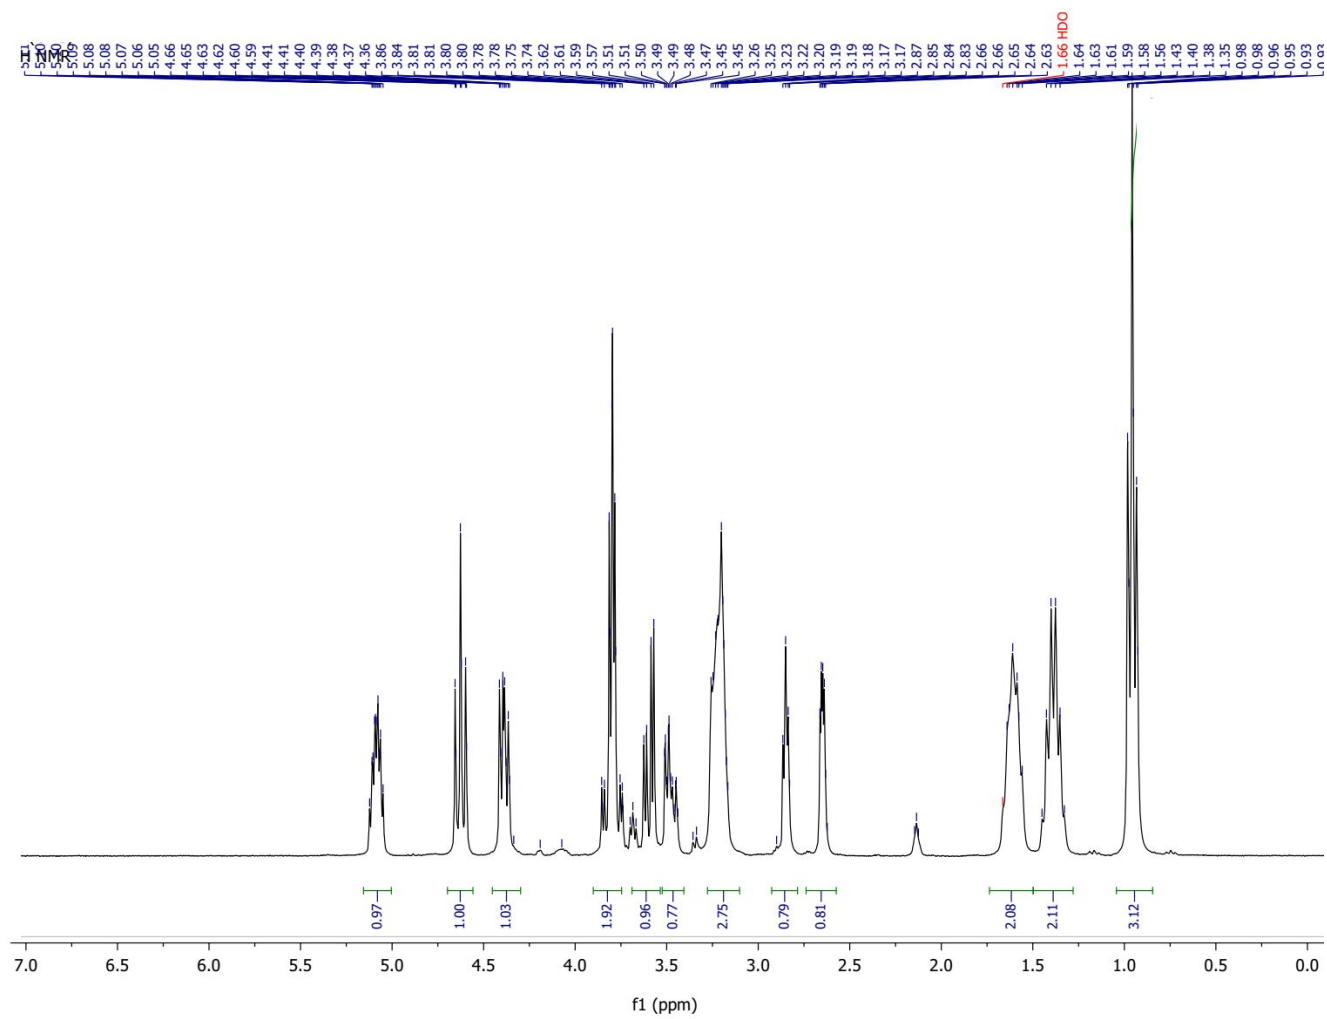

**Figure S22.** NMR spectrum for data reported in Table 1, Entry 21.

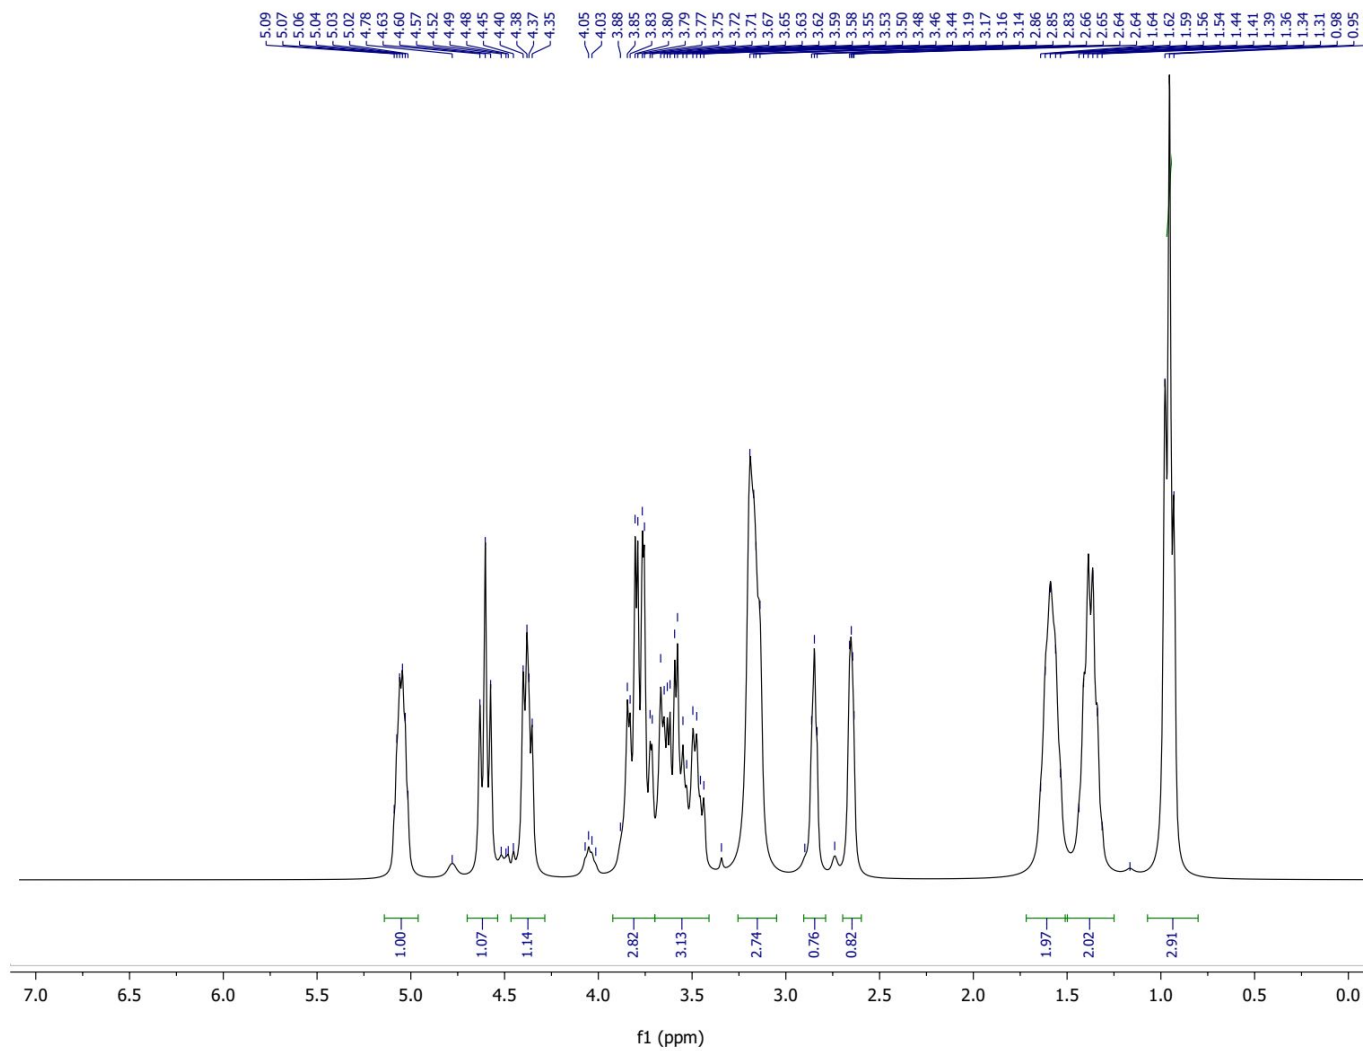

**Figure S23.**  $^1\text{H}$ -NMR spectrum for data reported in Table 1, Entry 22.

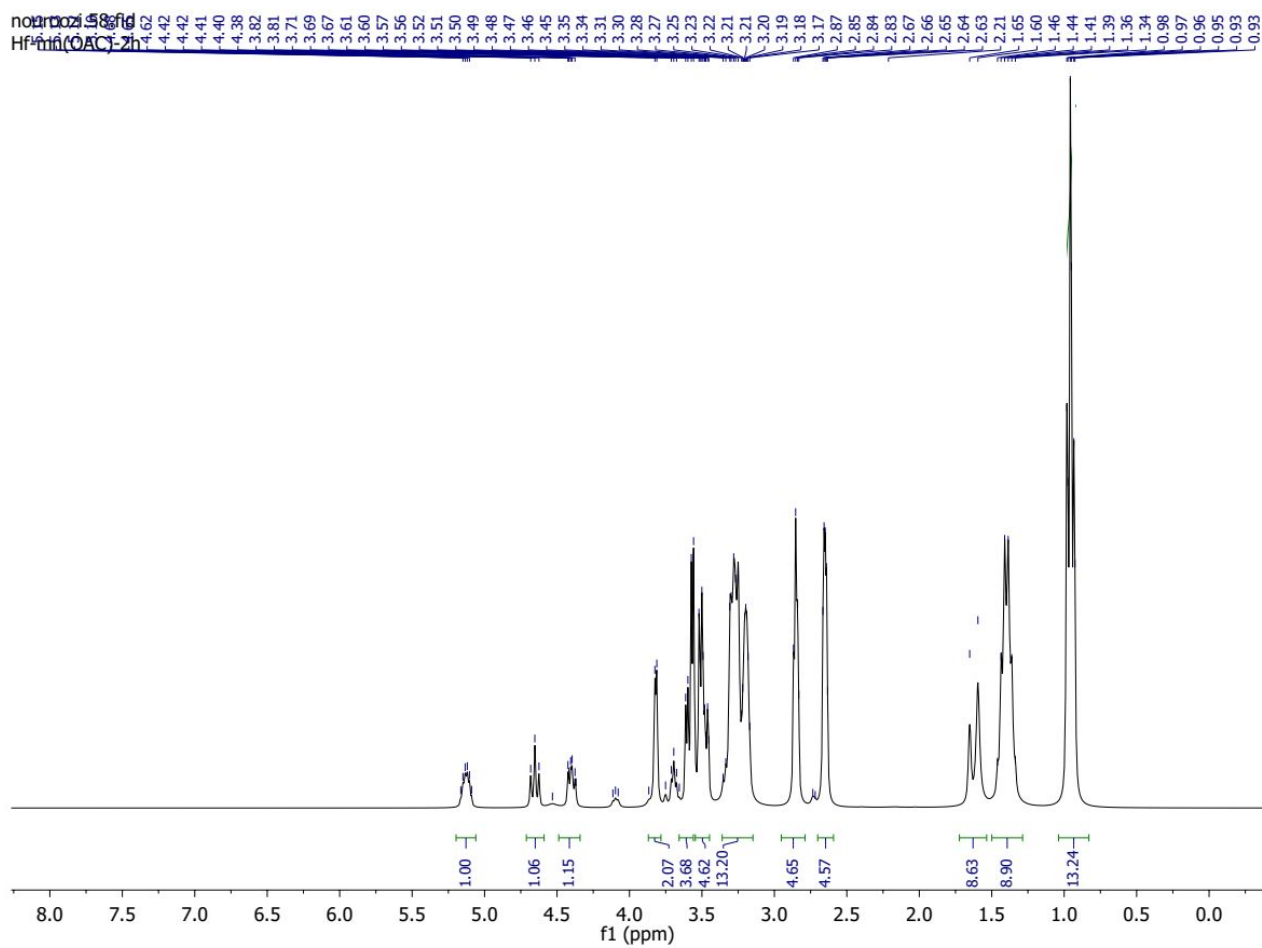

**Figure S24.**  $^1\text{H}$ -NMR spectrum for data reported in Table 2, Entry 1.



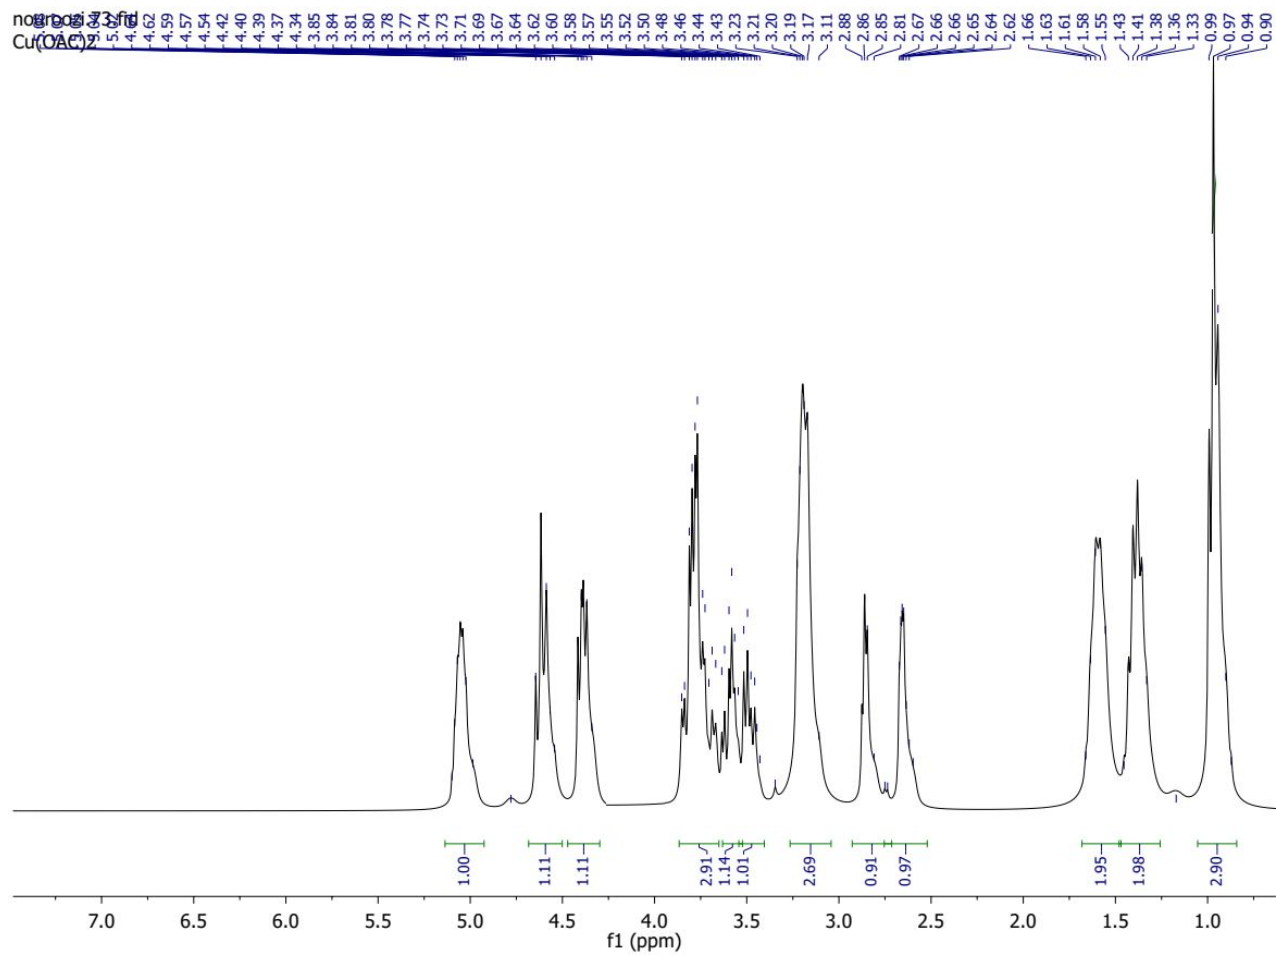

**Figure S26.**  $^1\text{H-NMR}$  spectrum for data reported in Table 2, Entry 3.

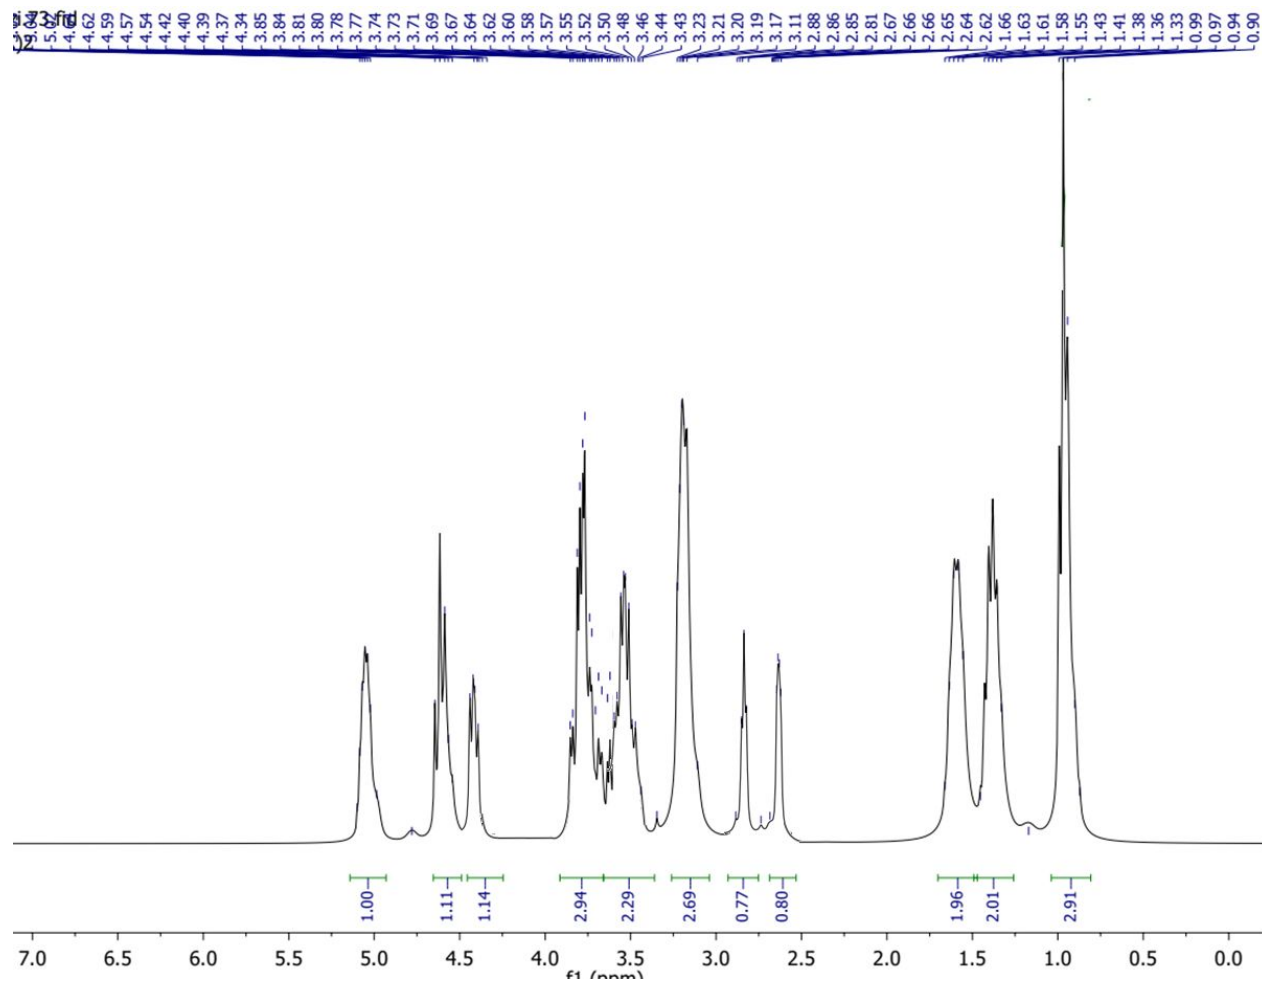

Figure S27. <sup>1</sup>H-NMR spectrum for data reported in Table 2, Entry 4.



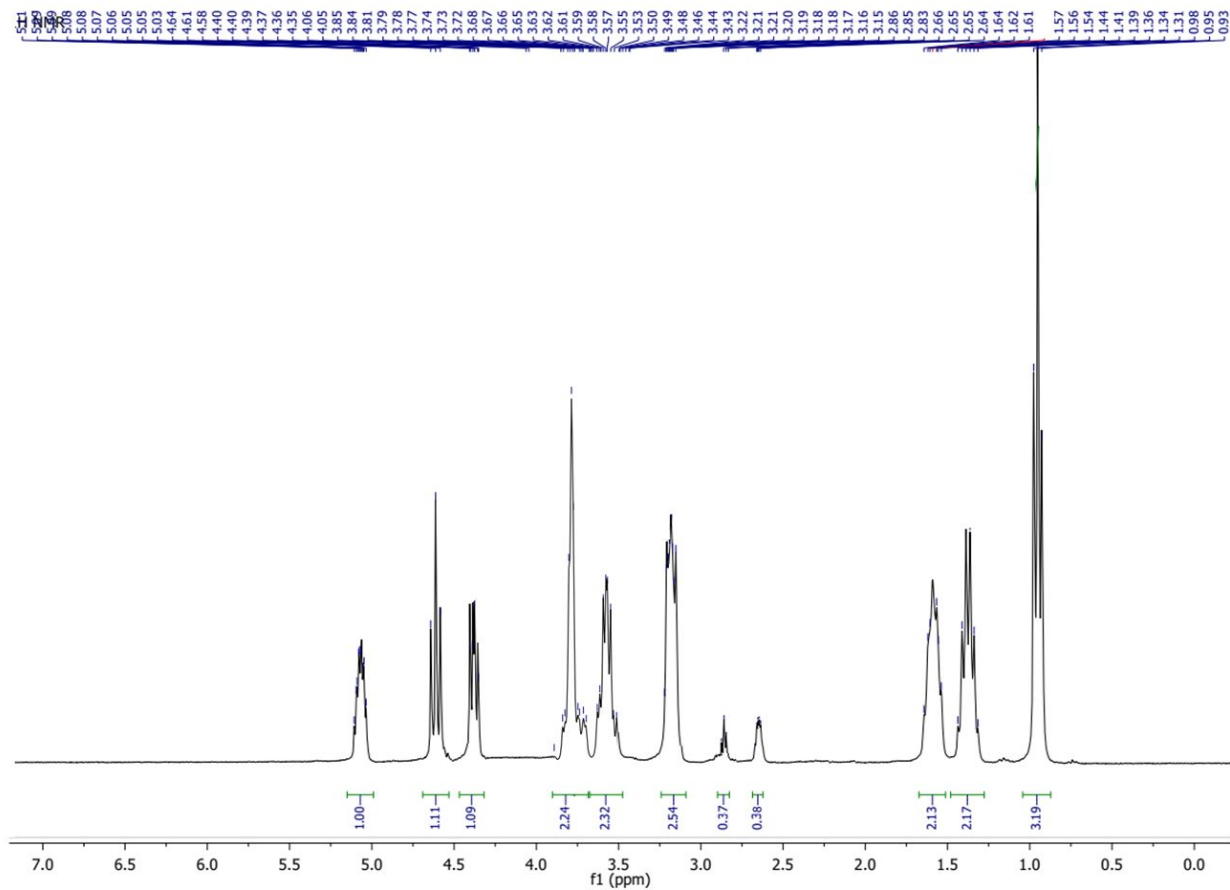

Figure S28. <sup>1</sup>H-NMR spectrum for data reported in Table 2, Entry 5.

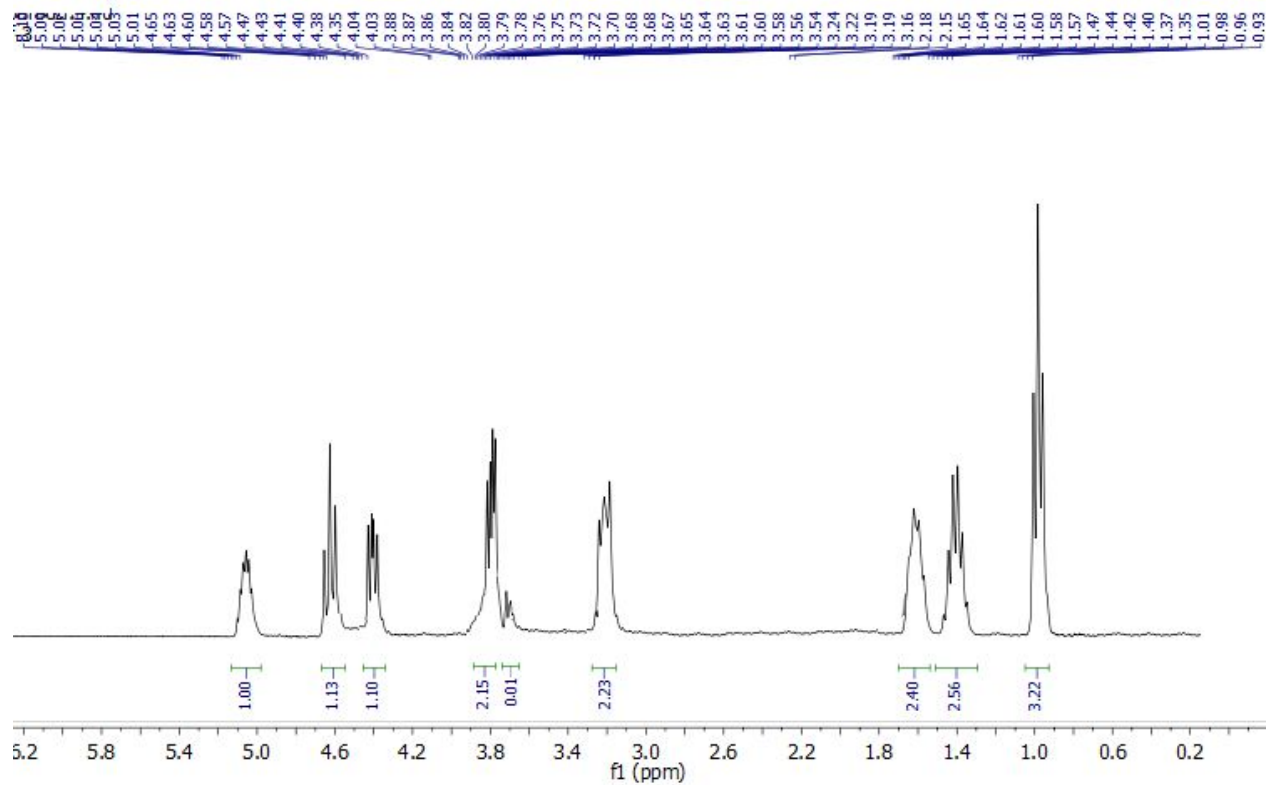

**Figure S29.** <sup>1</sup>H-NMR spectrum for data reported in Table 2, Entry 6.

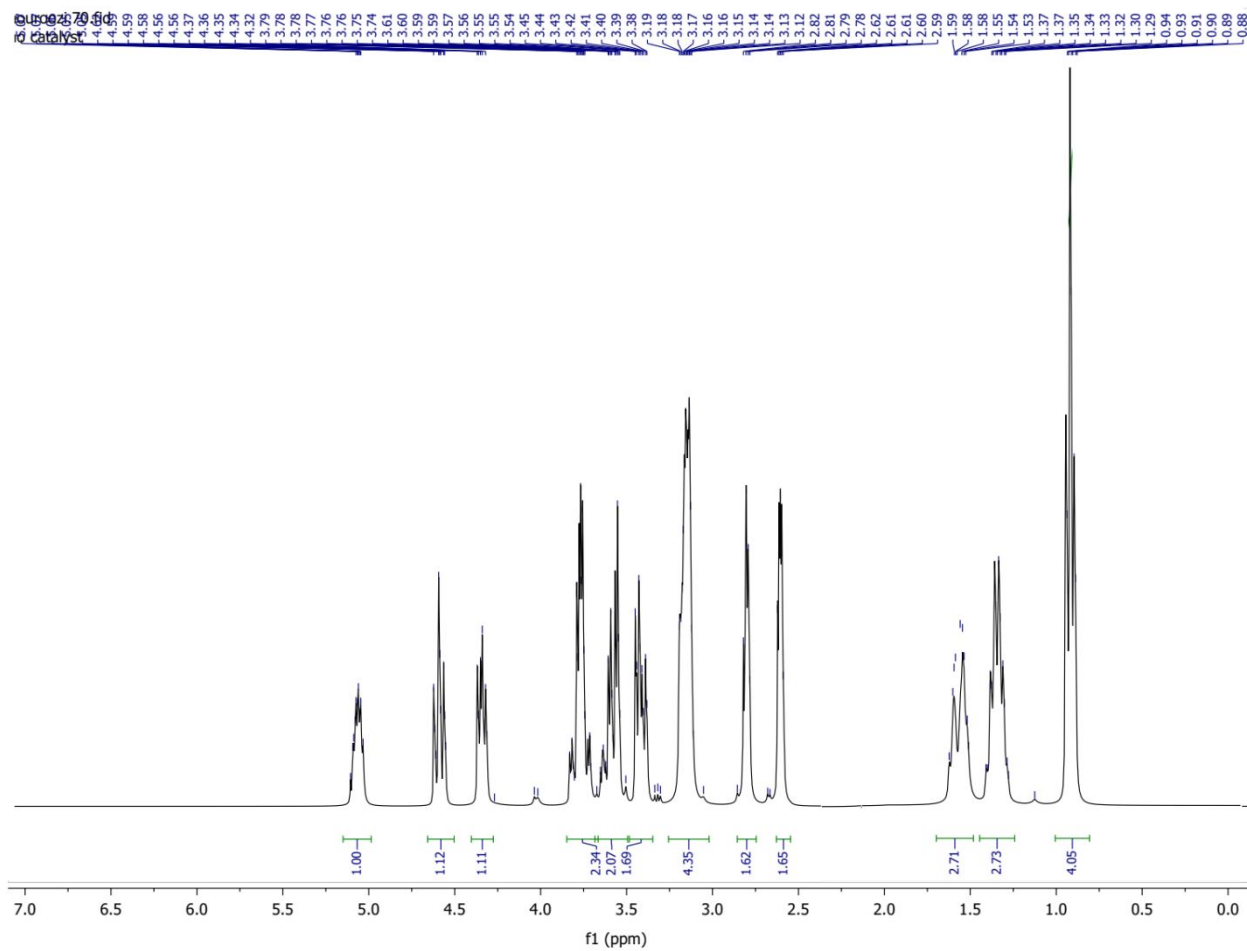

Figure S30. <sup>1</sup>H-NMR spectrum for data reported in Table 2, Entry 7.

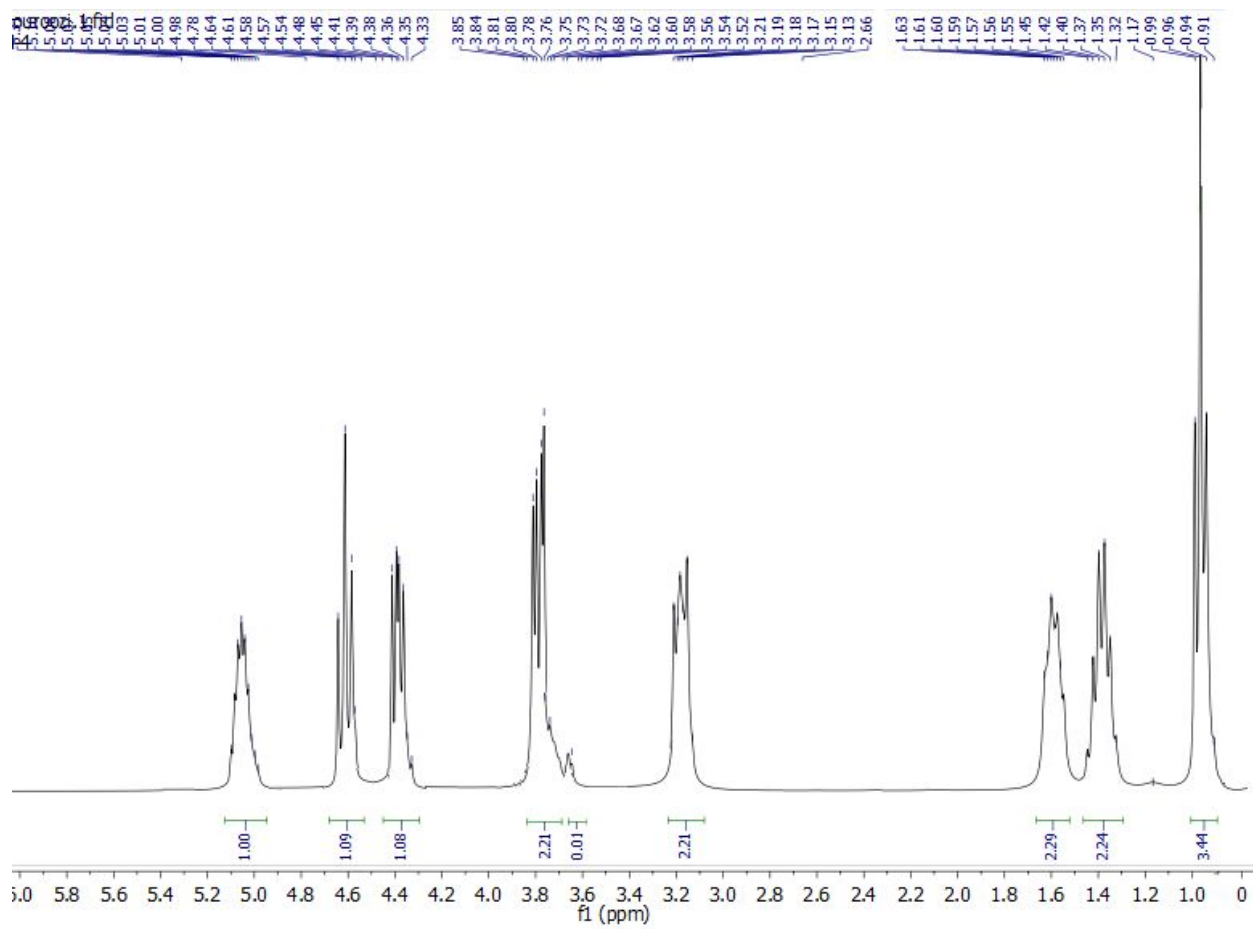

**Figure S31.**  $^1\text{H}$ -NMR spectrum for data reported in Table 2, Entry 8.

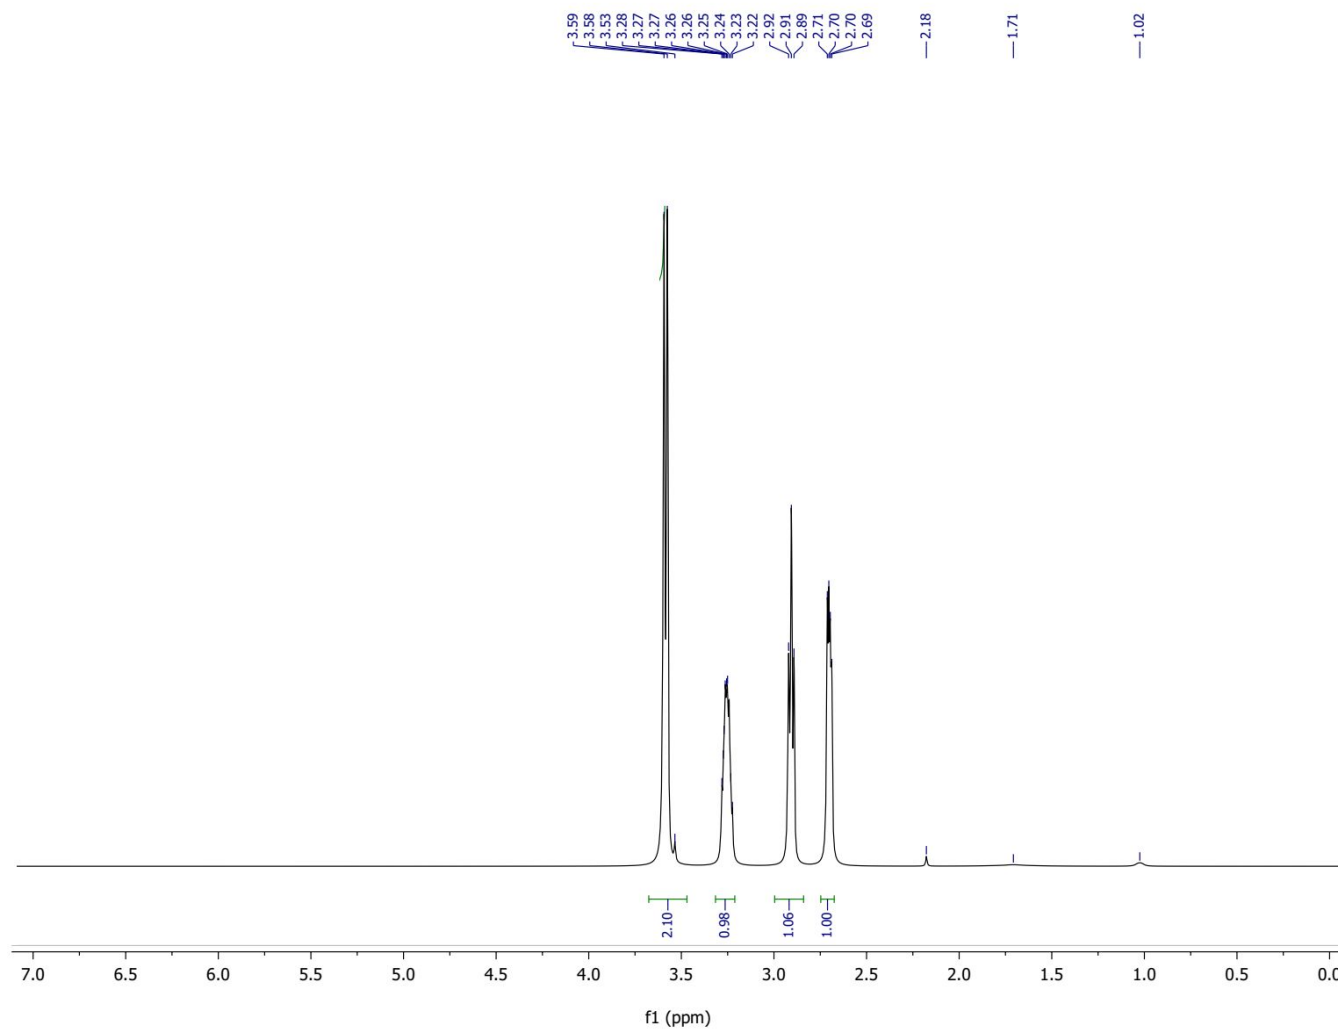

**Figure S32.** <sup>1</sup>H-NMR spectrum for data reported in Table 2, Entry 9.

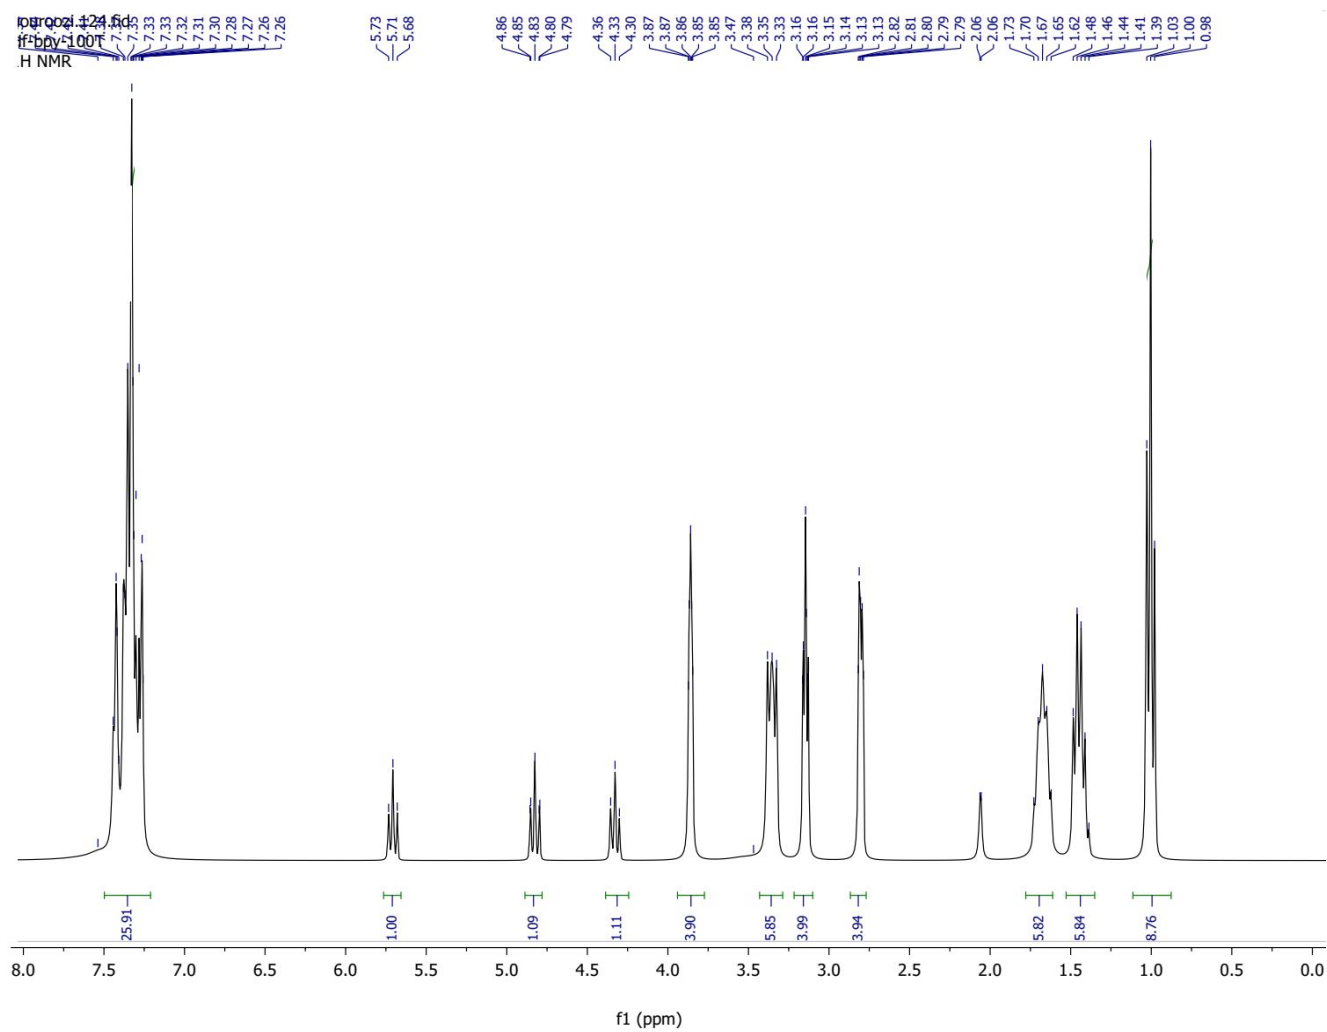

**Figure S33.**  $^1\text{H}$ -NMR spectrum for data reported in Table 4, Entry 3.

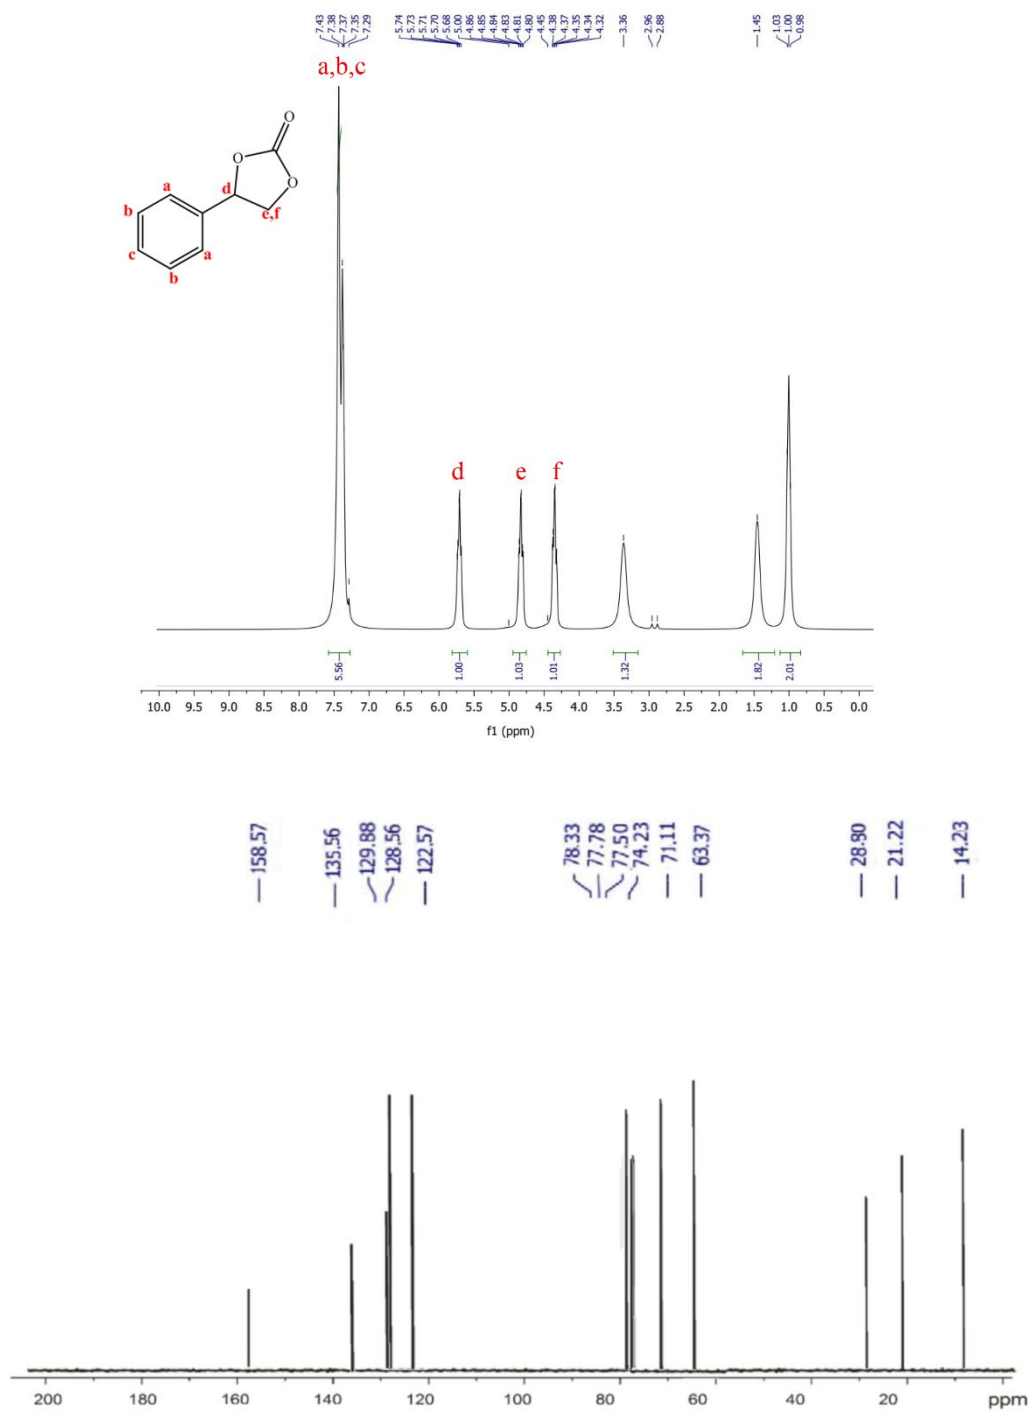

**Figure S34.** <sup>1</sup>H-NMR and <sup>13</sup>C-NMR spectrum for data reported in Table 4, Entry 4.





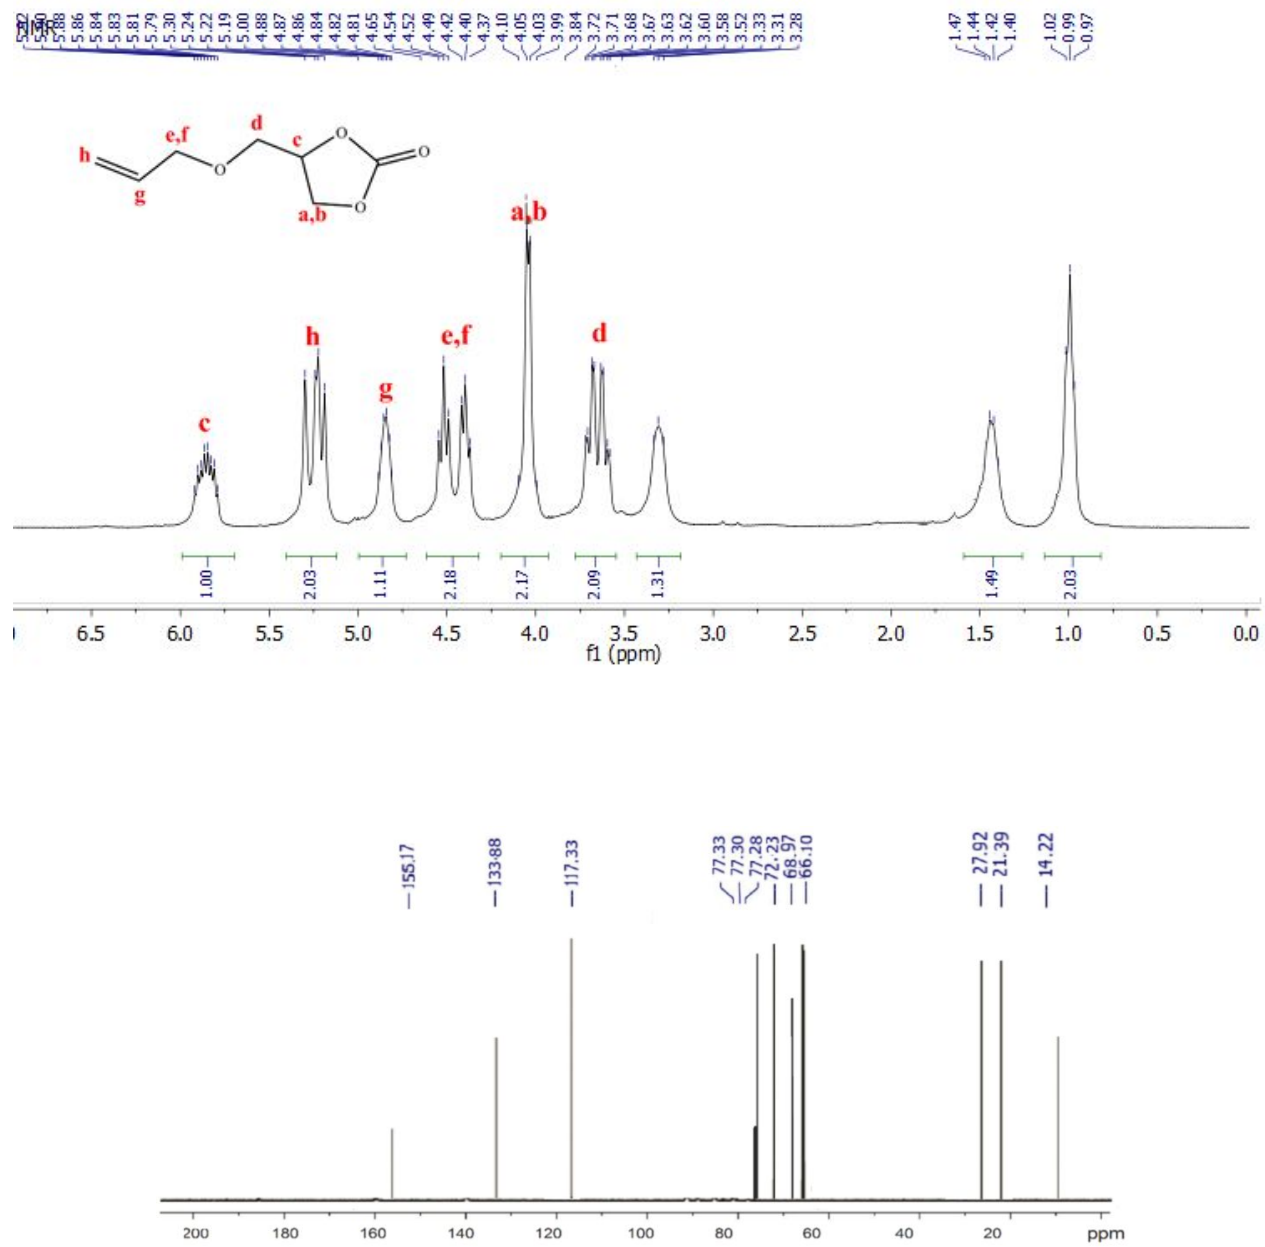

**Figure S36.** <sup>1</sup>H-NMR and <sup>13</sup>C-NMR spectrum for data reported in Table 4, Entry 6.

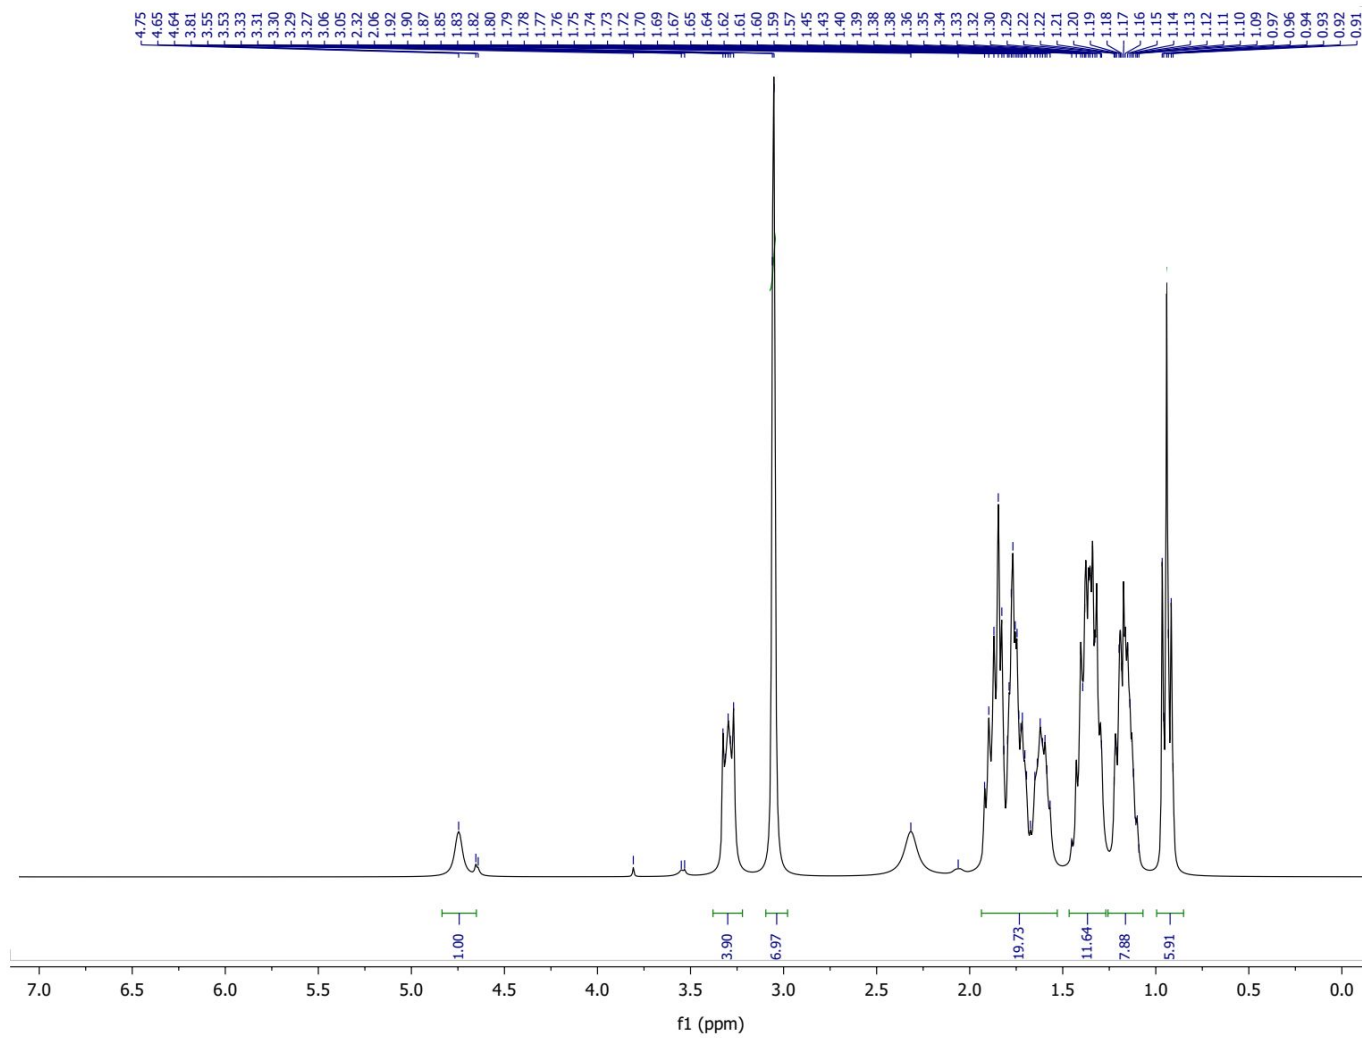

**Figure S37.**  $^1\text{H}$ -NMR spectrum for data reported in Table 4, Entry 7.

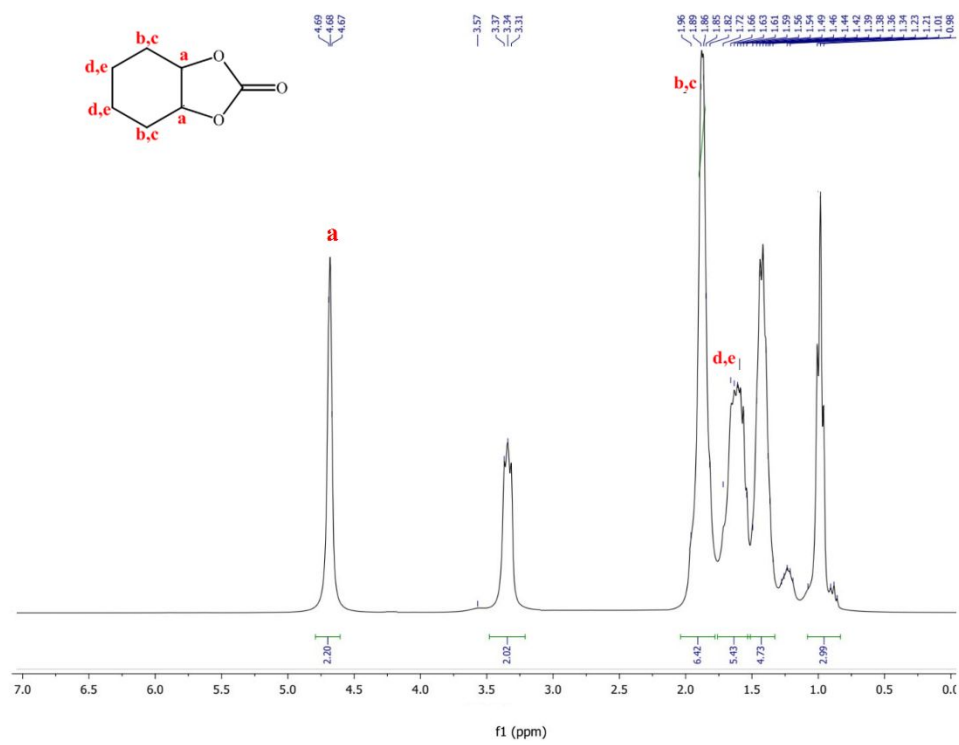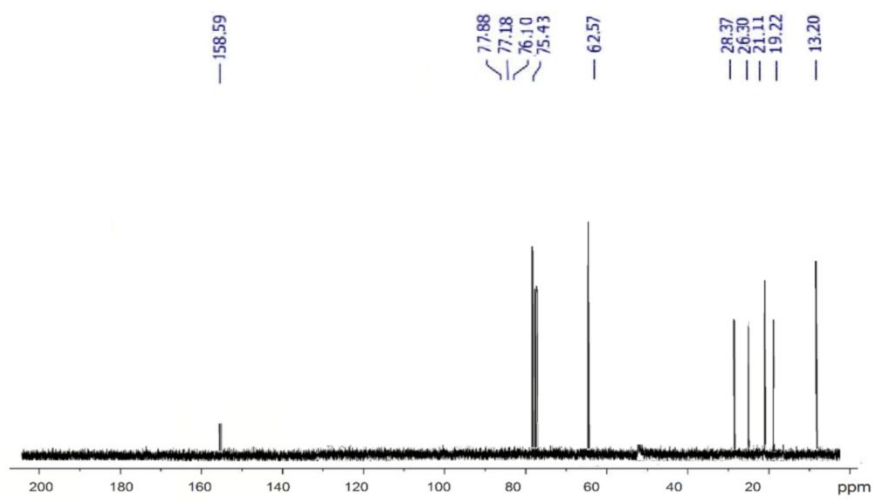

**Figure S38.** <sup>1</sup>H-NMR and <sup>13</sup>C-NMR spectrum for data reported in Table 4, Entry 8.

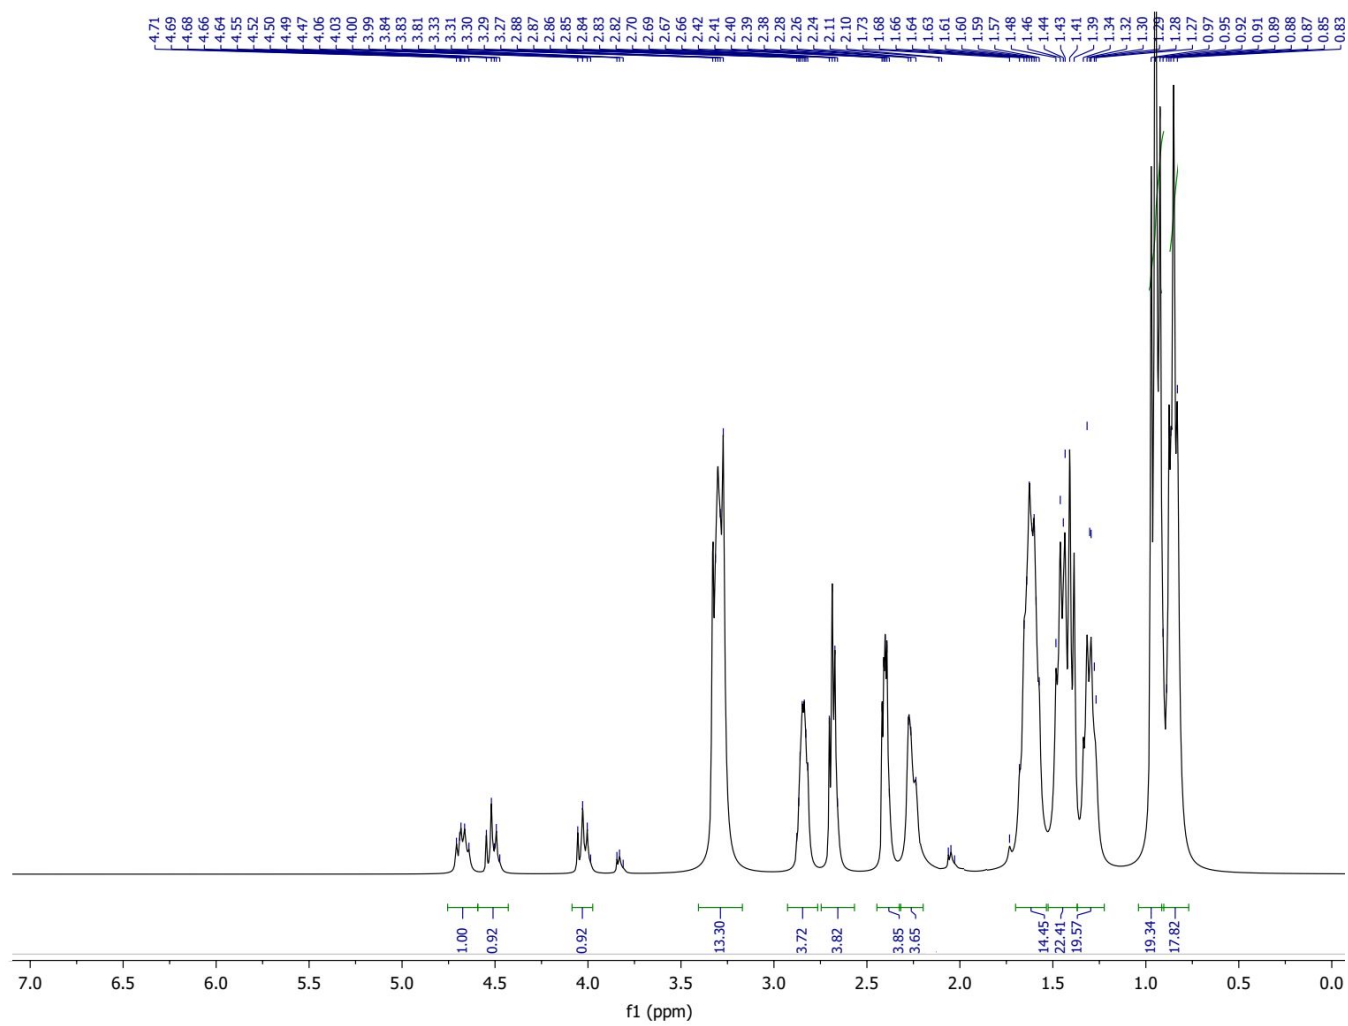

**Figure S39.**  $^1\text{H}$ -NMR spectrum for data reported in Table 4, Entry 9.

Table 4, Entry 10

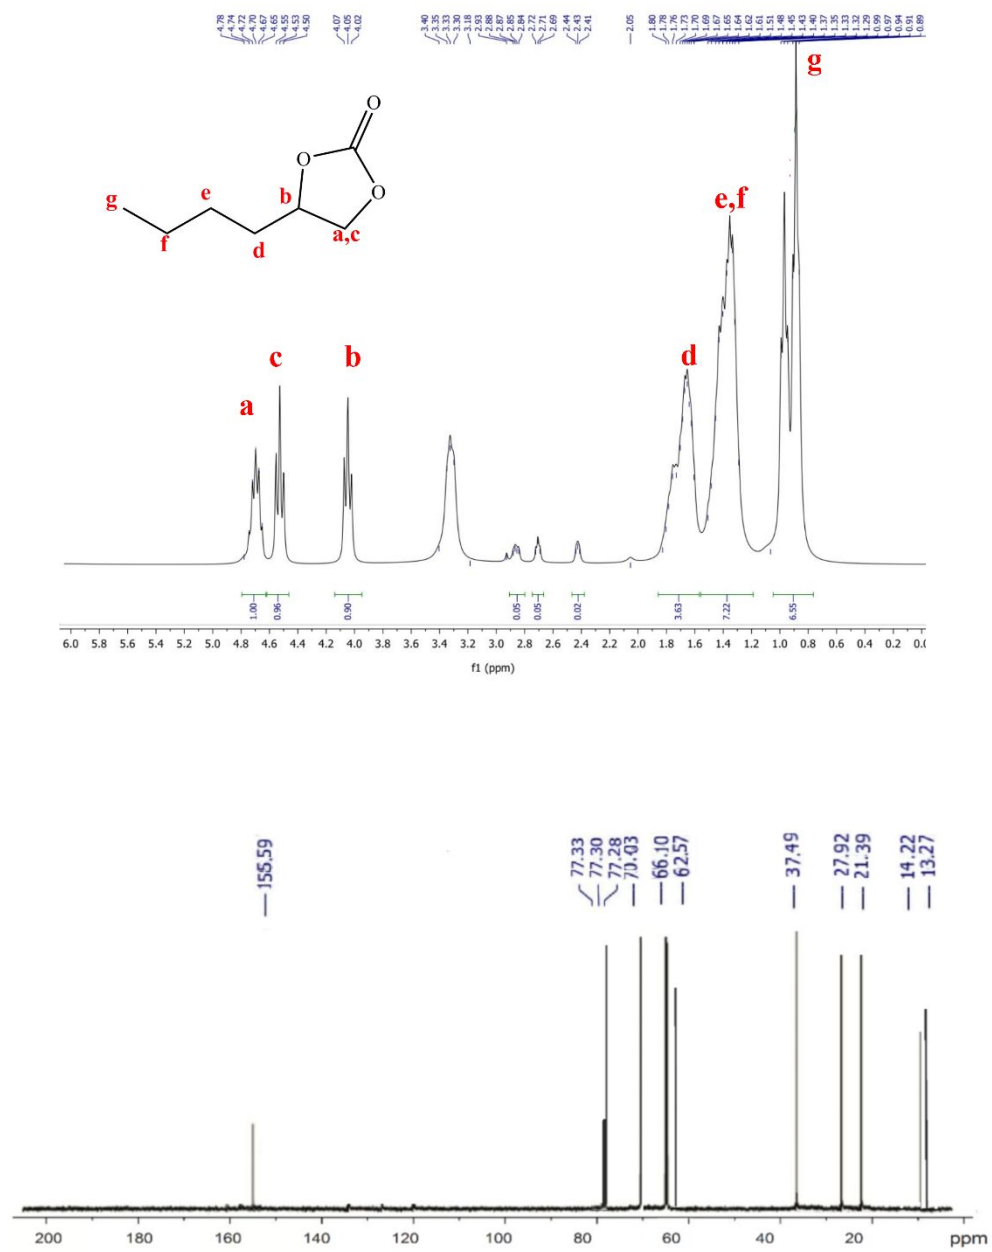

Figure S40.  $^1\text{H-NMR}$  and  $^{13}\text{C-NMR}$  spectrum for data reported in Table 4, Entry 10.

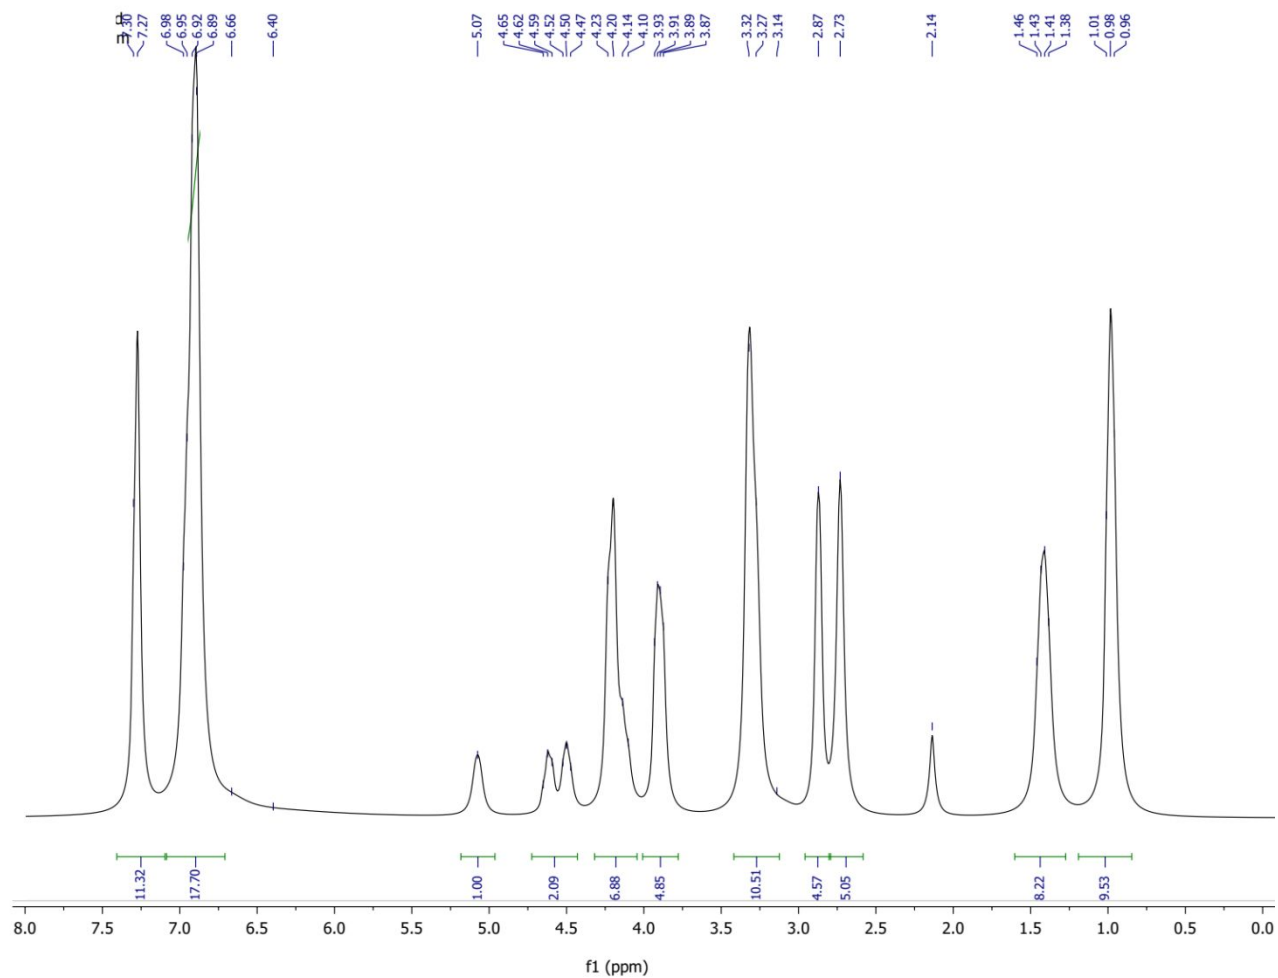

**Figure S41.** <sup>1</sup>H-NMR spectrum for data reported in Table 4, Entry 11.

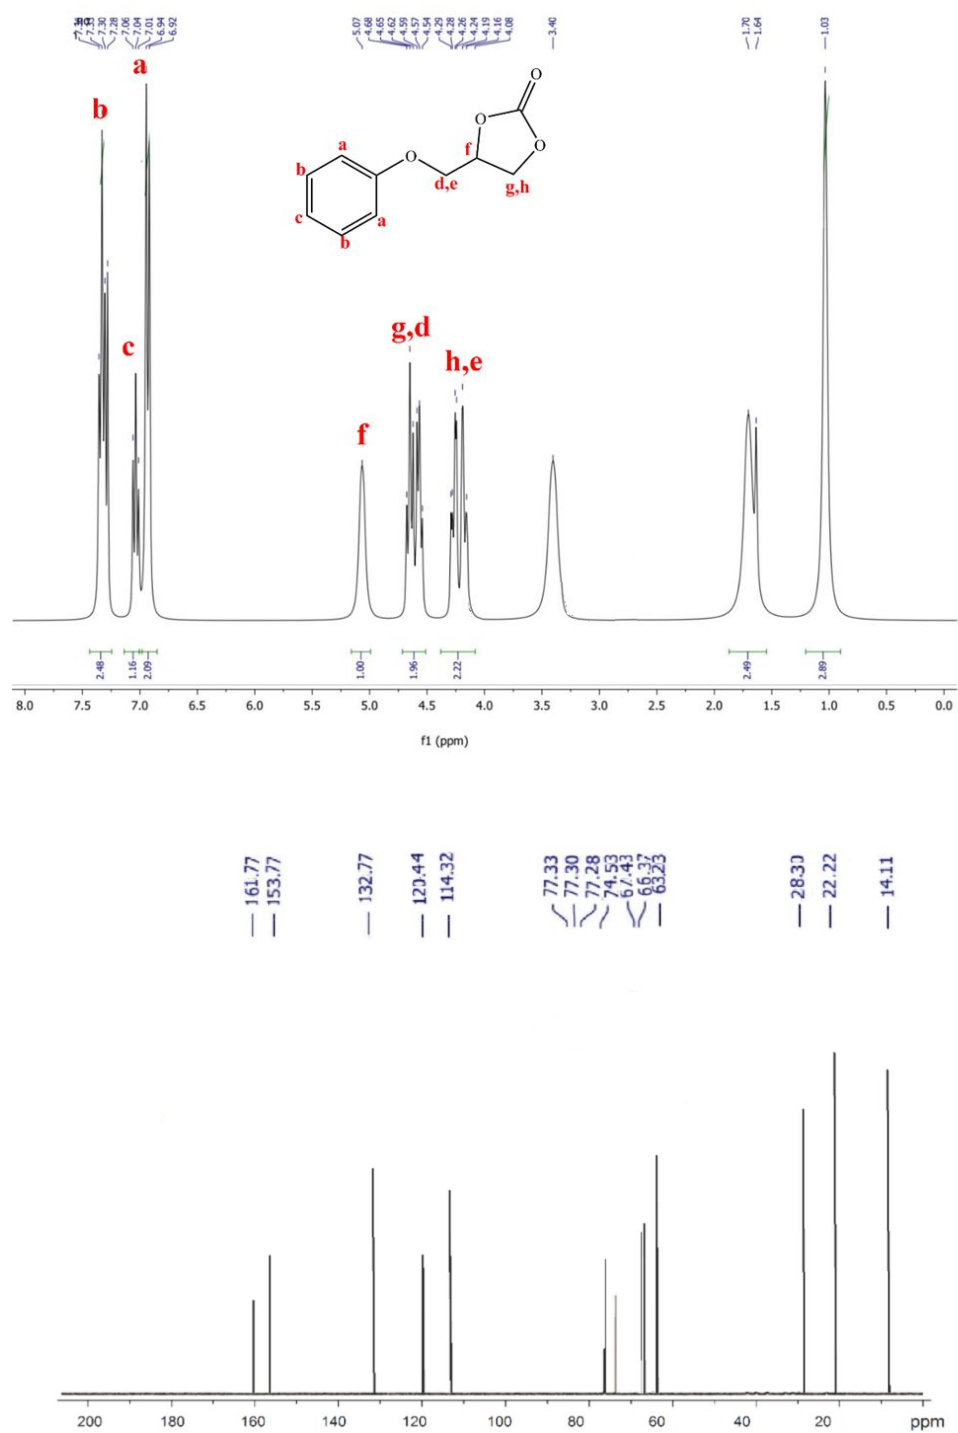

**Figure S42.** <sup>1</sup>H-NMR and <sup>13</sup>C-NMR spectrum for data reported in Table 4, Entry 12.

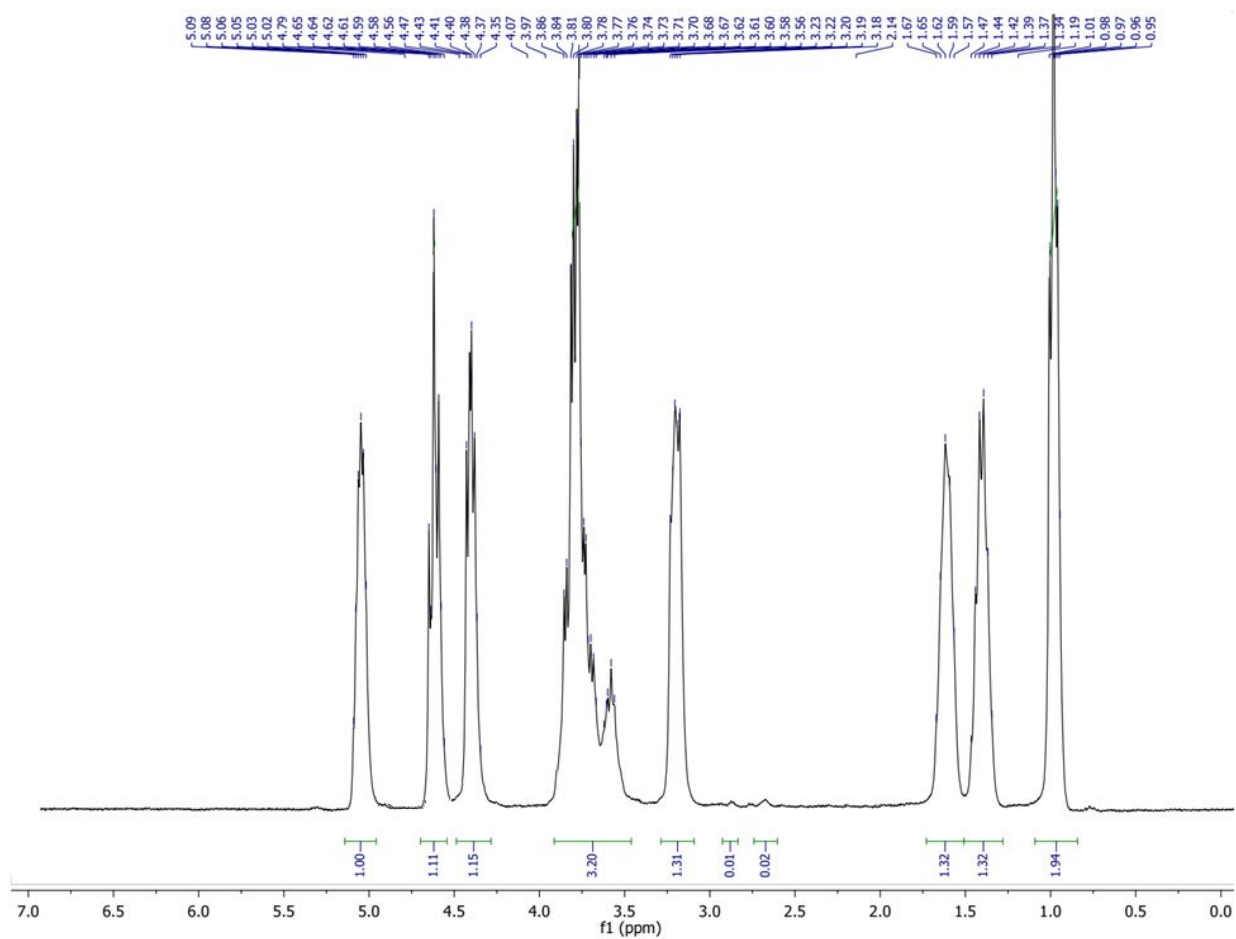

Figure S43. <sup>1</sup>H-NMR spectrum recyclability tests, Run 1.



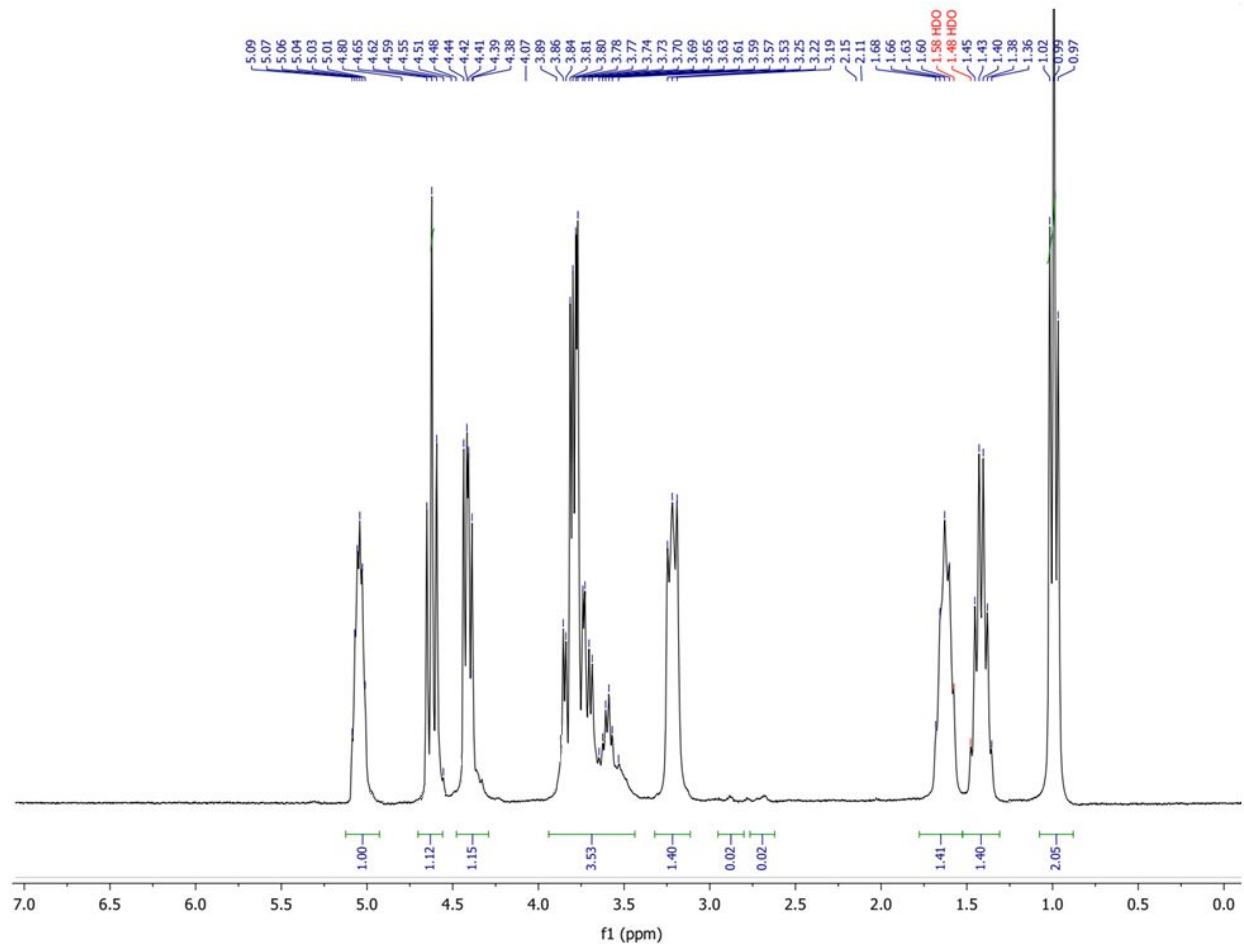

Figure S44. <sup>1</sup>H-NMR spectrum recyclability tests, Run 2.

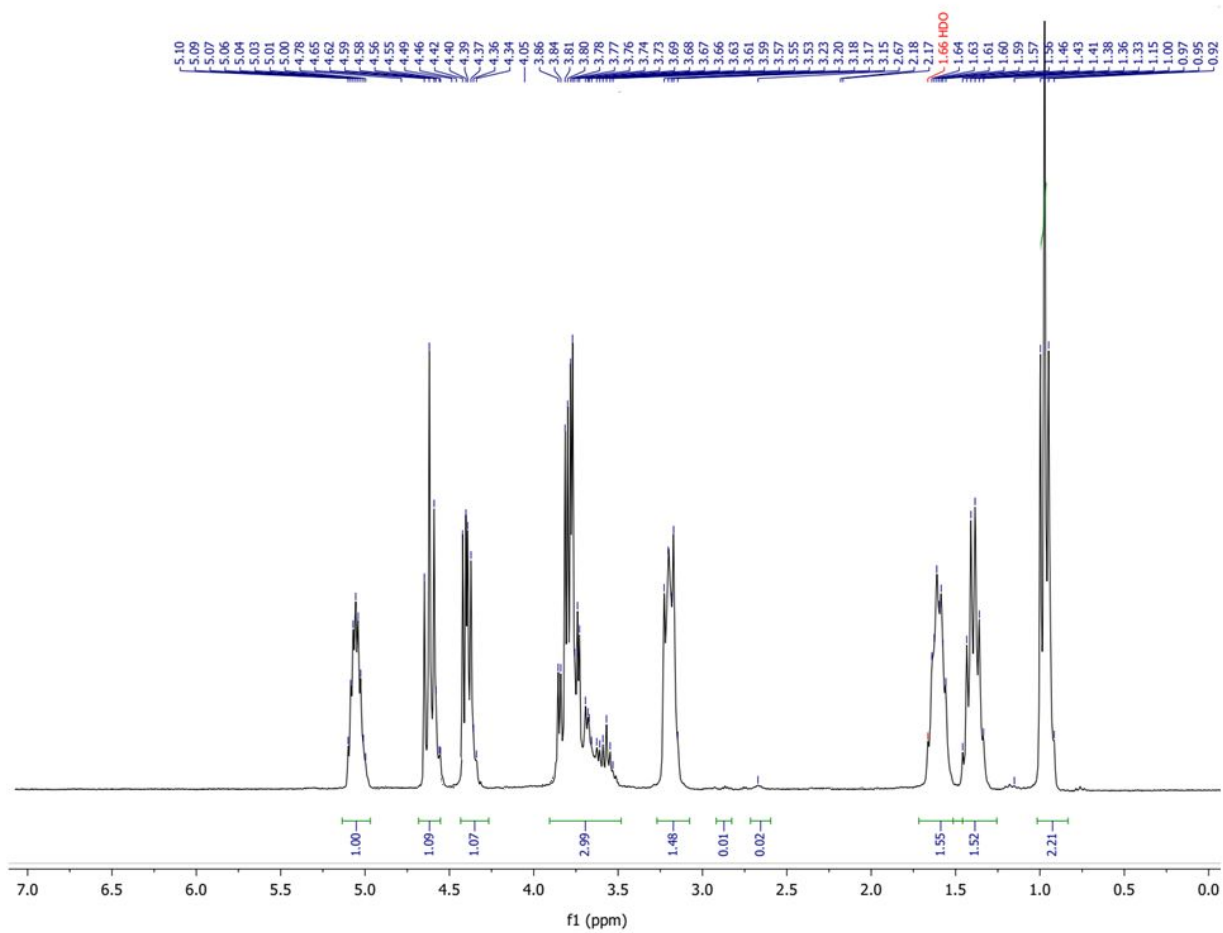

**Figure S45.** <sup>1</sup>H-NMR spectrum recyclability tests, Run 3.

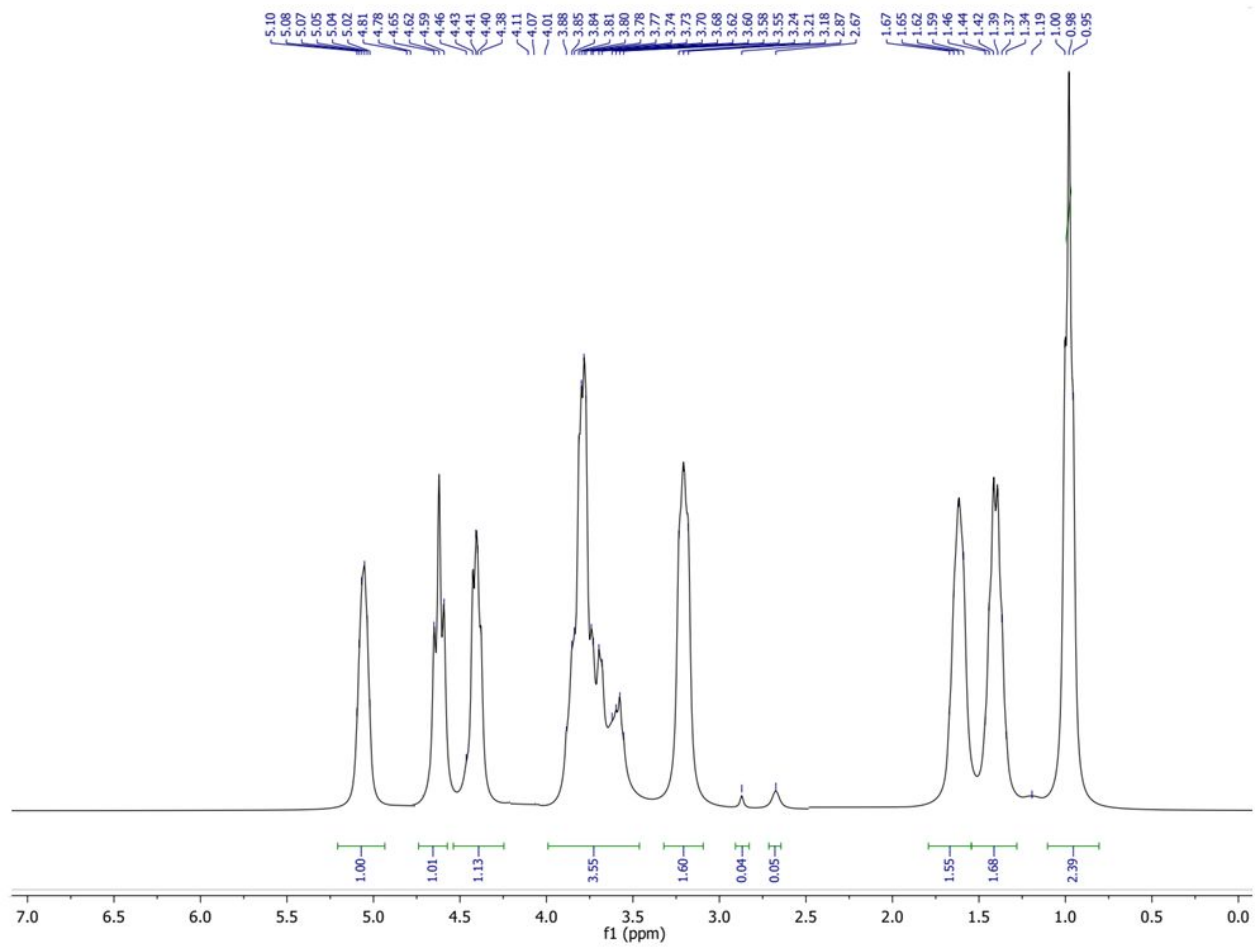

Figure S46. <sup>1</sup>H-NMR spectrum recyclability tests, Run 4.

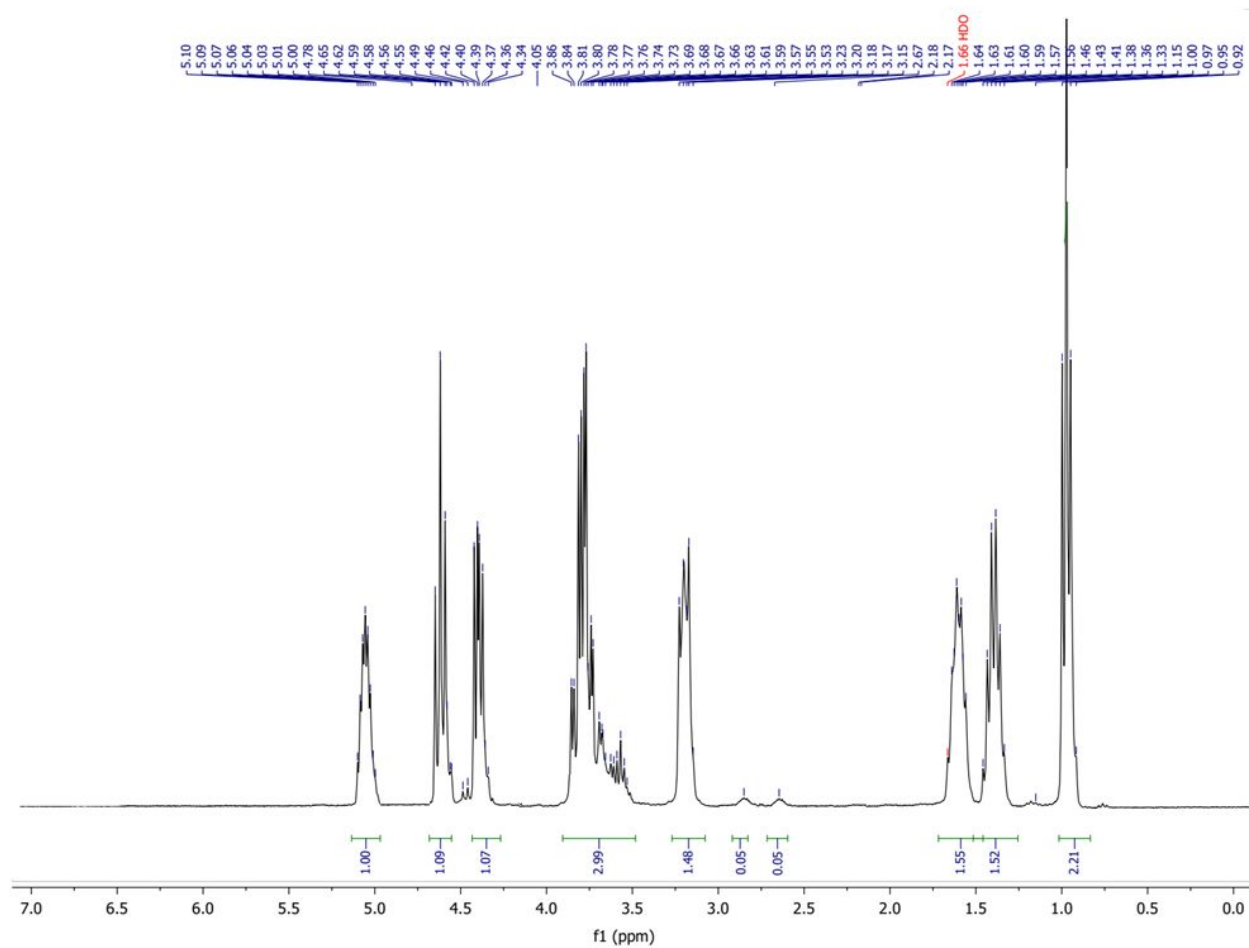

Figure S47. <sup>1</sup>H-NMR spectrum recyclability tests, Run 5.
